# Supplementary material for: In-depth understanding of electrochemical energy storage efficiency in a series of new 3d–4d mixed metal polyoxometalates: experimental and theoretical investigations
Source: Royal Society of Chemistry journal article supplement (doi:10.1039/d4ta03188a), 2024-01-01
Supplement: d4ta03188a1.pdf [file d4ta03188a1.pdf]

# **In-depth understanding of the electrochemical energy storage efficiency between a series of new 3d-4d mixed metal polyoxometalates: Experimental and Theoretical Investigations**

Kalyankumar S. Morla,<sup>[a]</sup> Dewendra Thakre,<sup>[a]</sup> Tushar Balasaheb Deshmukh,<sup>[b]</sup> Sunanda Malo,<sup>[c]</sup> Subuhan Ahamed,<sup>[c]</sup> Ravari Kandy Aparna,<sup>[d]</sup> Subham Sahoo,<sup>[e]</sup> Debajit Sarma,<sup>[e]</sup> Kartik Chandra Mondal,<sup>[c]</sup> Babasaheb R. Sankapal\*,<sup>[b]</sup> and Abhishek Banerjee\*<sup>[a]</sup>

<sup>[a]</sup>: Department of Chemistry, Visvesvaraya National Institute of Technology, Nagpur, India.

<sup>[b]</sup>: Department of Physics, Visvesvaraya National Institute of Technology, Nagpur, India.

<sup>[c]</sup>: Department of Chemistry, Indian Institute of Technology Madras, Chennai, India.

<sup>[d]</sup>: Department of Chemistry, Indian Institute of Science Education and Research Thiruvananthapuram, Thiruvananthapuram, India.

<sup>[e]</sup>: Department of Chemistry, Indian Institute of Technology Patna, Patna, India.

## **Supporting Information**

**Table S1.** Bond Valence Sum (BVS) calculations for vanadium and molybdenum atoms in polyanion **1**,  $[(\text{Mo}^{\text{VI}}_2\text{O}_5)_2(\text{V}^{\text{III}}\text{O}_2)\{\text{O}_3\text{P}-\text{C}(\text{O})(\text{CH}_2-4-\text{C}_5\text{H}_4\text{N})-\text{PO}_3\}_2]^{7-}$ .

| Bond    | Bond Length | Bond Valence | Bond Valence Sum          |
|---------|-------------|--------------|---------------------------|
| V1-O2P2 | 2.019 (5)   | 0.474        | $\sum(\text{V1}) = 3.029$ |
| V1-O2P1 | 2.012 (5)   | 0.472        |                           |
| V1-O1V1 | 1.952 (5)   | 0.568        |                           |
| V1-O2P2 | 2.019 (5)   | 0.474        |                           |
| V1-O2P1 | 2.012 (5)   | 0.472        |                           |
| V1-O1V1 | 1.952 (5)   | 0.568        |                           |

| Bond     | Bond Length | Bond Valence | Bond Valence Sum           |
|----------|-------------|--------------|----------------------------|
| Mo1-O1P1 | 2.399 (5)   | 0.265        | $\sum(\text{Mo1}) = 6.078$ |
| Mo1-O12  | 1.942 (5)   | 0.909        |                            |
| Mo1-O1P2 | 2.340 (5)   | 0.310        |                            |
| Mo1-O1V1 | 1.865 (5)   | 1.121        |                            |
| Mo1-O1B  | 1.701 (6)   | 1.747        |                            |
| Mo1-O1A  | 1.704 (6)   | 1.730        |                            |

| Bond     | Bond Length | Bond Valence | Bond Valence Sum           |
|----------|-------------|--------------|----------------------------|
| Mo2-O1P1 | 2.305 (5)   | 0.341        | $\sum(\text{Mo2}) = 6.125$ |
| Mo2-O1P2 | 2.333 (5)   | 0.316        |                            |
| Mo2-O12  | 1.789 (6)   | 1.375        |                            |
| Mo2-O1C  | 2.037 (5)   | 0.703        |                            |
| Mo2-O2B  | 1.711 (6)   | 1.695        |                            |
| Mo2-O2A  | 1.712 (6)   | 1.693        |                            |

**Table S2.** Bond Valence Sum (BVS) calculations for chromium and molybdenum atoms in polyanion **2**,  $[(\text{Mo}^{\text{VI}}_2\text{O}_5)_2(\text{Cr}^{\text{III}}\text{O}_2)\{\text{O}_3\text{P}-\text{C}(\text{O})(\text{CH}_2-4-\text{C}_5\text{H}_4\text{N})-\text{PO}_3\}_2]^{7-}$ .

| Bond     | Bond Length | Bond Valence | Bond Valence Sum             |
|----------|-------------|--------------|------------------------------|
| Cr1-O1CR | 1.938 (2)   | 0.558        | $\Sigma(\text{Cr1}) = 3.088$ |
| Cr1-O1CR | 1.938 (2)   | 0.558        |                              |
| Cr1-O2P1 | 1.989 (2)   | 0.489        |                              |
| Cr1-O2P1 | 1.989 (2)   | 0.489        |                              |
| Cr1-O1P2 | 1.985 (2)   | 0.497        |                              |
| Cr1-O1P2 | 1.985 (2)   | 0.497        |                              |

| Bond     | Bond Length | Bond Valence | Bond Valence Sum             |
|----------|-------------|--------------|------------------------------|
| Mo1-O1B  | 1.720 (3)   | 1.657        | $\Sigma(\text{Mo1}) = 5.958$ |
| Mo1-O1A  | 1.733 (3)   | 1.602        |                              |
| Mo1-O12  | 2.036 (3)   | 0.705        |                              |
| Mo1-O1CR | 1.787 (2)   | 0.382        |                              |
| Mo1-O2P2 | 2.347 (2)   | 0.304        |                              |
| Mo1-O3P1 | 2.343 (2)   | 0.308        |                              |

| Bond     | Bond Length | Bond Valence | Bond Valence Sum             |
|----------|-------------|--------------|------------------------------|
| Mo2-O2B  | 1.720 (3)   | 1.656        | $\Sigma(\text{Mo2}) = 5.949$ |
| Mo2-O2A  | 1.714 (3)   | 1.684        |                              |
| Mo2-O12  | 1.853 (3)   | 1.156        |                              |
| Mo2-O1C  | 1.944 (2)   | 0.904        |                              |
| Mo2-O2P2 | 2.370 (2)   | 0.286        |                              |
| Mo2-O3P1 | 2.402 (2)   | 0.266        |                              |



**Table S3.** Bond Valence Sum (BVS) calculations for vanadium and molybdenum atoms in polyanion **3**,  $[(\text{Mo}^{\text{VI}}_2\text{O}_5)_2(\text{Mn}^{\text{III}}\text{O}_2)\{\text{O}_3\text{P}-\text{C}(\text{O})(\text{CH}_2-4-\text{C}_5\text{H}_4\text{N})-\text{PO}_3\}_2]^{7-}$ .

| Bond     | Bond Length | Bond Valence | Bond Valence Sum             |
|----------|-------------|--------------|------------------------------|
| Mn1-O1MN | 1.919 (3)   | 0.654        | $\Sigma(\text{Mn1}) = 2.974$ |
| Mn1-O1P2 | 2.028 (3)   | 0.487        |                              |
| Mn1-O1P1 | 2.152 (3)   | 0.346        |                              |
| Mn1-O1MN | 1.919 (3)   | 0.654        |                              |
| Mn1-O1P2 | 2.028 (3)   | 0.487        |                              |
| Mn1-O1P1 | 2.152 (3)   | 0.346        |                              |

| Bond     | Bond Length | Bond Valence | Bond Valence Sum             |
|----------|-------------|--------------|------------------------------|
| Mo1-O1B  | 1.724 (4)   | 1.639        | $\Sigma(\text{Mo1}) = 5.960$ |
| Mo1-O1A  | 1.725 (4)   | 1.634        |                              |
| Mo1-O1MN | 1.801 (3)   | 1.331        |                              |
| Mo1-O12  | 2.026 (4)   | 0.726        |                              |
| Mo1-O2P2 | 2.331 (3)   | 0.318        |                              |
| Mo1-O1P1 | 2.338 (3)   | 0.312        |                              |

| Bond     | Bond Length | Bond Valence | Bond Valence Sum             |
|----------|-------------|--------------|------------------------------|
| Mo2-O2A  | 1.707 (4)   | 1.718        | $\Sigma(\text{Mo2}) = 6.019$ |
| Mo2-O2B  | 1.720 (4)   | 1.657        |                              |
| Mo2-O12  | 1.851 (4)   | 1.162        |                              |
| Mo2-O2P1 | 2.360 (3)   | 0.294        |                              |
| Mo2-O2P2 | 2.394 (3)   | 0.268        |                              |
| Mo2-O1C  | 1.937 (3)   | 0.920        |                              |

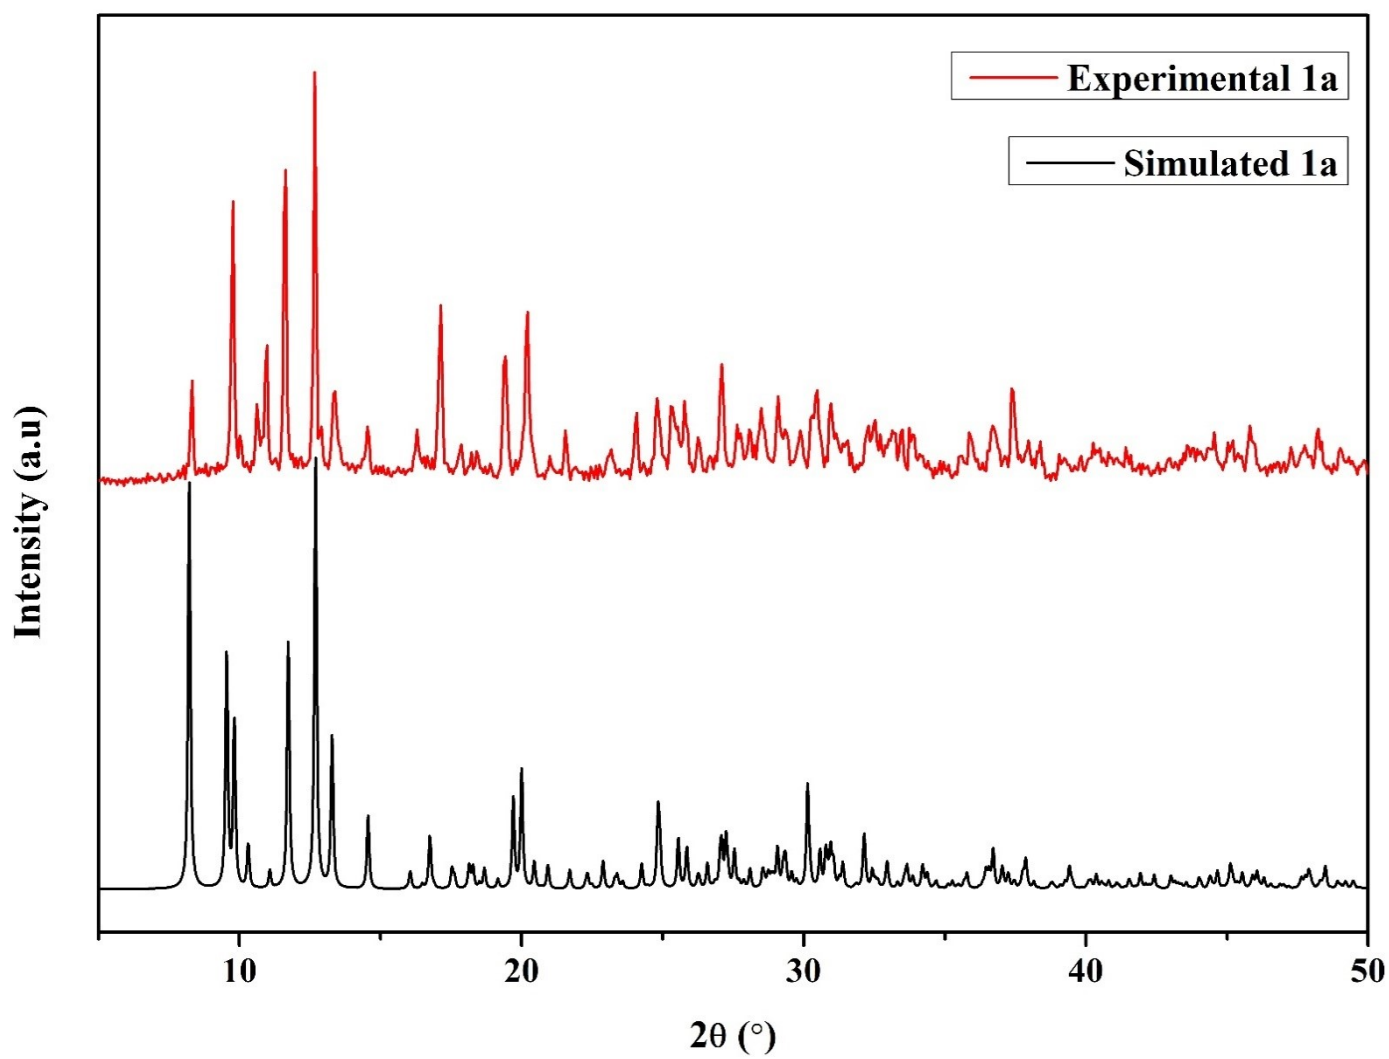

**Figure S1.** Comparative PXRD of compound **1a** (simulated vs experimental).

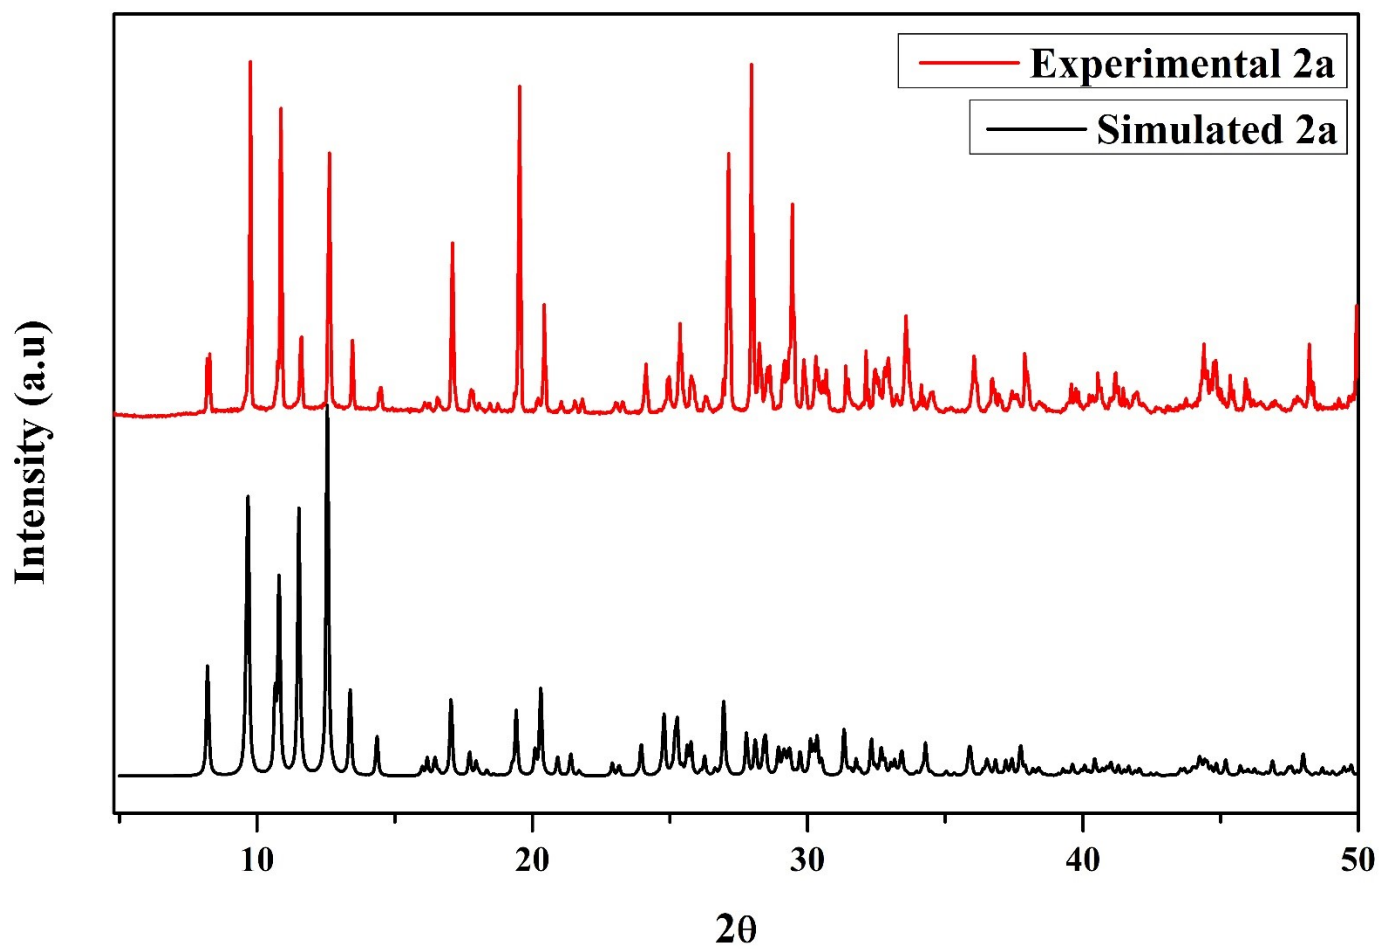

**Figure S2.** Comparative PXRD of compound **2a** (simulated vs experimental).

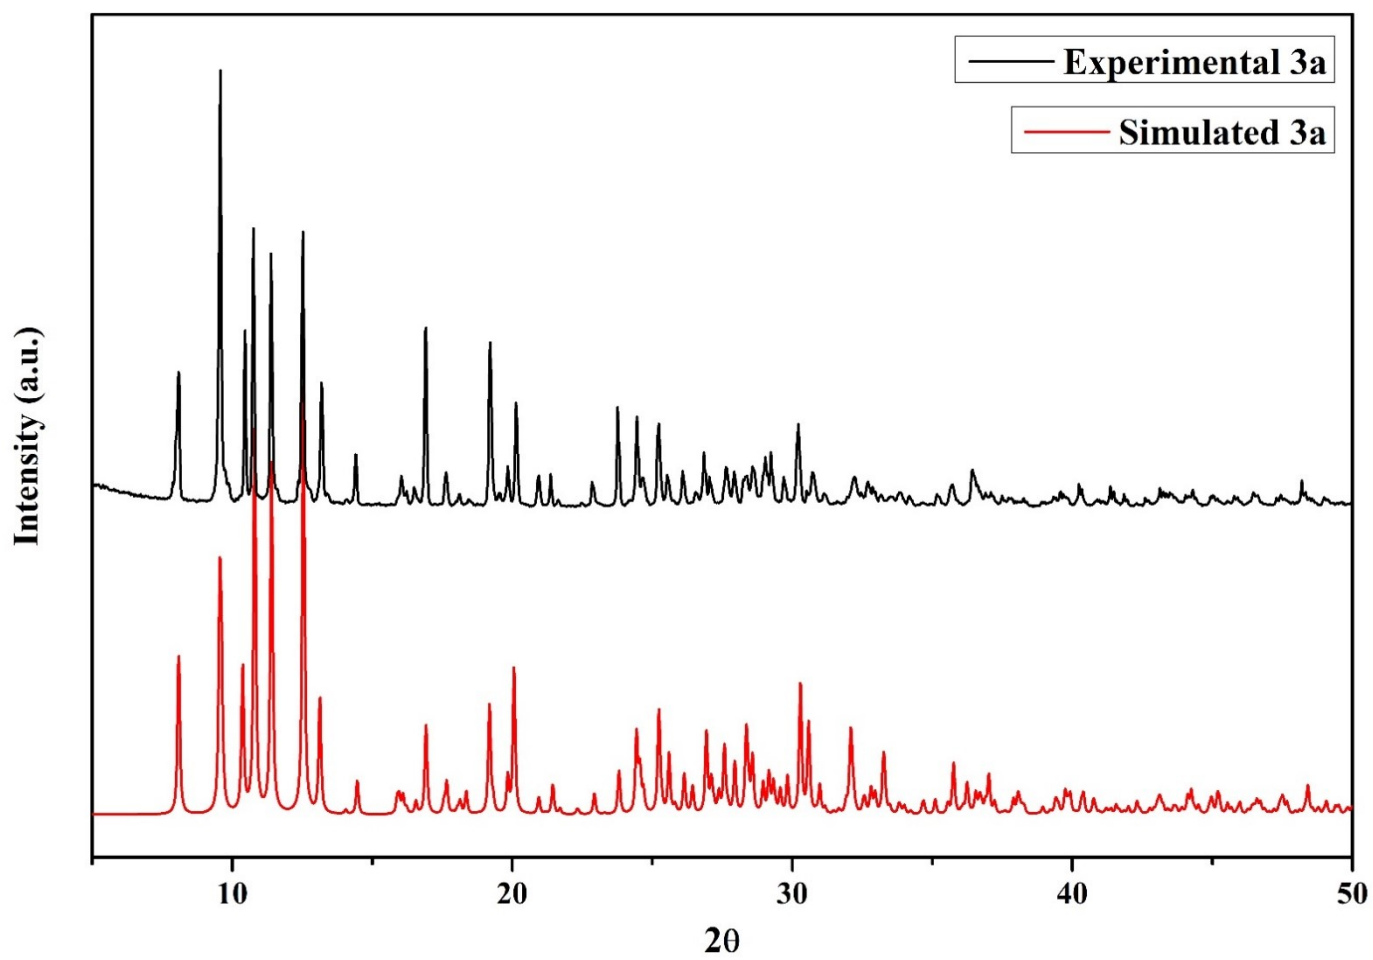

**Figure S3.** Comparative PXRD of compound **3a** (simulated vs experimental).



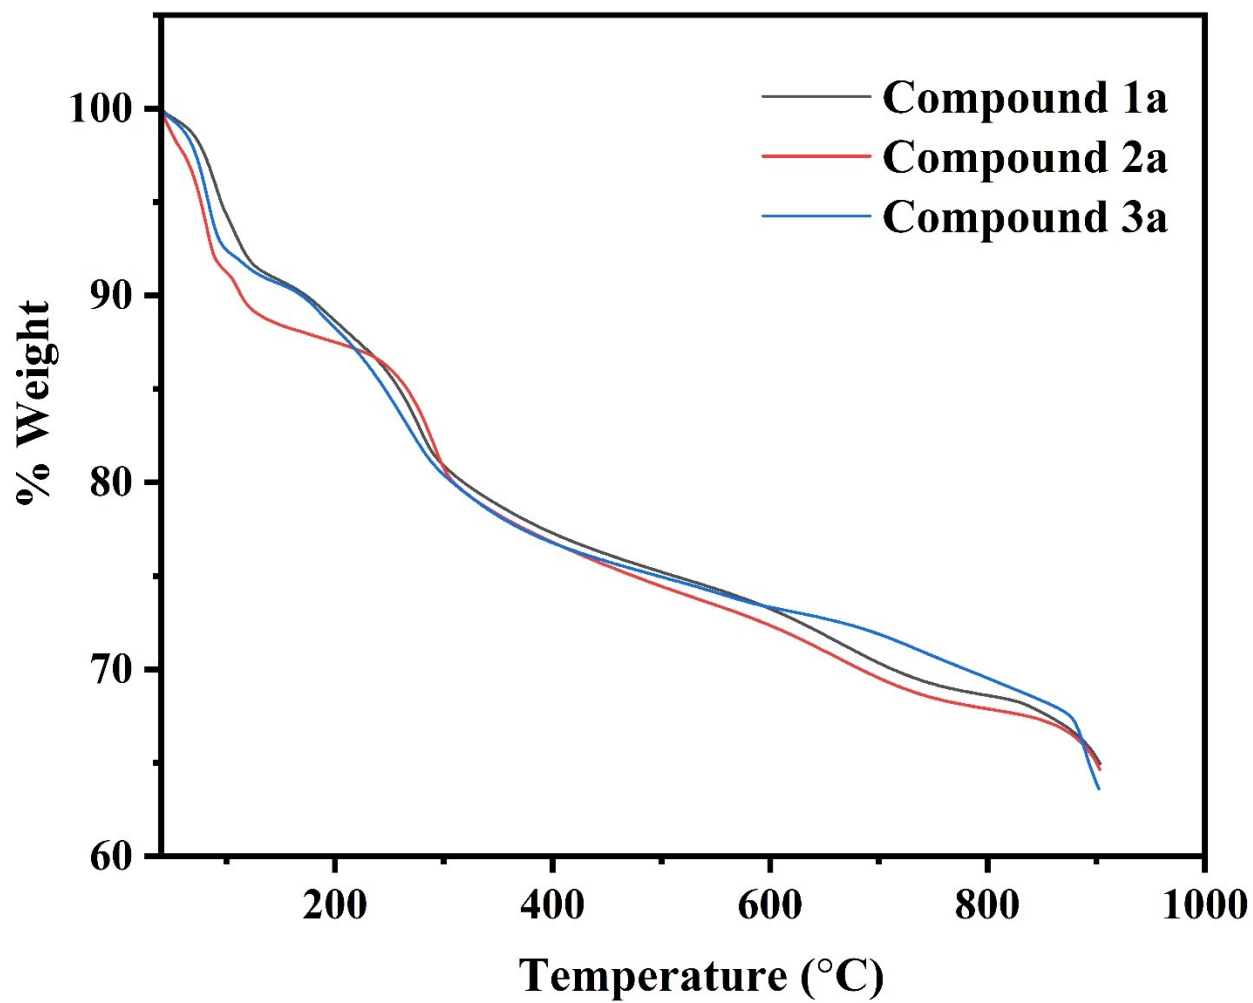

Figure S4. Comparative thermal analysis plots of compounds 1a, 2a and 3a.

## Theoretical calculations

The geometry optimization of compounds, namely  $1^{++}$  performed in its doublet,  $1'$  in triplet,  $2'$  and  $1'^-$  are quartet,  $3'$  and  $2'^-$  in the quintet,  $3'^-$  in sextet state at the B3LYP-D3(BJ)/Def2-SVP<sup>[S1]</sup> level of theory using the Gaussian 16 program<sup>[S2]</sup> package in the gaseous phase as well as in water medium with the use of Density Functional Theory<sup>[S3]</sup> (DFT). B3LYP is a hybrid functional that combines the Becke three-parameter exchange functional (B3) with the Lee-Yang-Parr correlation functional (LYP). B3LYP includes a fraction of exact exchange (20-30%), which is based on Hartree-Fock's theory. The inclusion of exact exchange performs well for a broad range of molecular properties, including reaction energies, vibrational frequencies, and electronic transitions.

**Table S4:** The different molecules in their total charge and spin multiplicity used for optimisation of polyanionic species  $[(\text{Mo}^{\text{VI}}\text{O}_5)_2(\text{M}^{\text{III}}\text{O}_2)\{\text{O}_3\text{PC}(\text{O})(\text{CH}_2\text{-4-C}_5\text{NH}_4)\text{PO}_3\}_2]^{7-}$  ( $1' - 3'$ ) and  $[(\text{Mo}^{\text{VI}}\text{O}_5)_2(\text{M}^{\text{II}}\text{O}_2)\{\text{O}_3\text{PC}(\text{O})(\text{CH}_2\text{-4-C}_5\text{NH}_4)\text{PO}_3\}_2]^{8-}$  ( $1'^- - 3'^-$ ) at the B3LYP-D3(BJ)/Def2-SVP level of theory using (DFT).

| Complexes                   | Total Charge (q) | Spin Multiplicity (2S+1) |
|-----------------------------|------------------|--------------------------|
| $\text{V}^{3+}$ ( $1'$ )    | -7               | 3 (S = 1)                |
| $\text{Cr}^{3+}$ ( $2'$ )   | -7               | 4 (S = 3/2)              |
| $\text{Mn}^{3+}$ ( $3'$ )   | -7               | 5 (S = 2)                |
| $\text{V}^{2+}$ ( $1'^-$ )  | -8               | 4 (S = 3/2)              |
| $\text{Cr}^{2+}$ ( $2'^-$ ) | -8               | 5 (S = 2)                |
| $\text{Mn}^{2+}$ ( $3'^-$ ) | -8               | 6 (S = 5/2)              |
| $\text{V}^{4+}$ ( $1'^+$ )  | -6               | 2 (S = 1/2)              |

**Table S5.** HOMO-LUMO energy gap of polyanionic species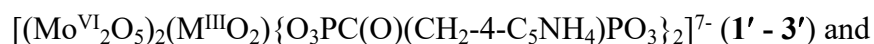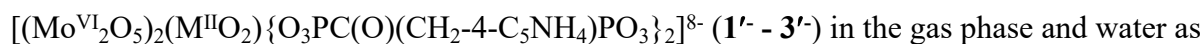

a solvent medium at B3LYP-D3(BJ)/Def2-SVP level of theory

| Complexes                       | HOMO – LUMO Energy Difference in the gas phase (eV) | HOMO – LUMO Energy Difference in water medium (eV) |
|---------------------------------|-----------------------------------------------------|----------------------------------------------------|
| V <sup>3+</sup> ( <b>1'</b> )   | 2.43                                                | 3.42                                               |
| Cr <sup>3+</sup> ( <b>2'</b> )  | 3.23                                                | 4.60                                               |
| Mn <sup>3+</sup> ( <b>3'</b> )  | 3.03                                                | 3.43                                               |
| V <sup>2+</sup> ( <b>1''</b> )  | 0.20                                                | 1.90                                               |
| Cr <sup>2+</sup> ( <b>2''</b> ) | 0.20                                                | 3.62                                               |
| Mn <sup>2+</sup> ( <b>3''</b> ) | 2.22                                                | 3.06                                               |
| V <sup>4+</sup> ( <b>1''</b> )  | 3.10                                                | 3.30                                               |

**Table S6.** Calculation of difference of energy upon reduction in the gas phase and water medium at B3LYP-D3(BJ)/Def2-SVP level of theory. All the values are in kcal/mol.

| Reduction process                                                 | $\Delta E$ (gas phase) | $\Delta E$ (water medium) |
|-------------------------------------------------------------------|------------------------|---------------------------|
| V <sup>3+</sup> ( <b>1'</b> ) to V <sup>2+</sup> ( <b>1''</b> )   | 308.77                 | -47.85                    |
| Cr <sup>3+</sup> ( <b>2'</b> ) to Cr <sup>2+</sup> ( <b>2''</b> ) | 310.70                 | -58.31                    |
| Mn <sup>3+</sup> ( <b>3'</b> ) to Mn <sup>2+</sup> ( <b>3''</b> ) | 327.89                 | -81.32                    |
| V <sup>4+</sup> ( <b>1''</b> ) to V <sup>3+</sup> ( <b>1'</b> )   | 264.42                 | -67.21                    |

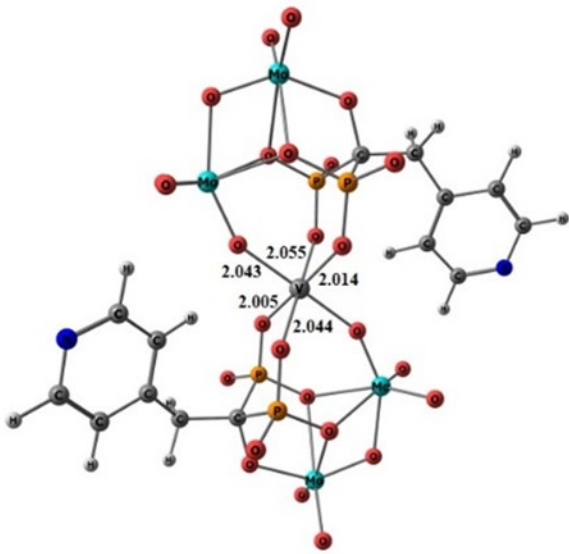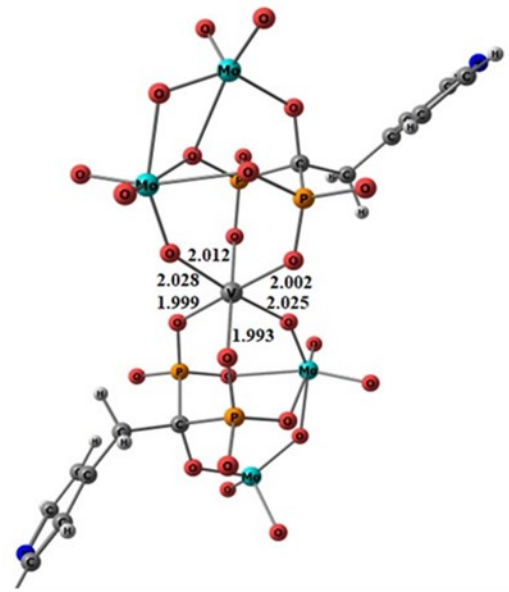

(a)

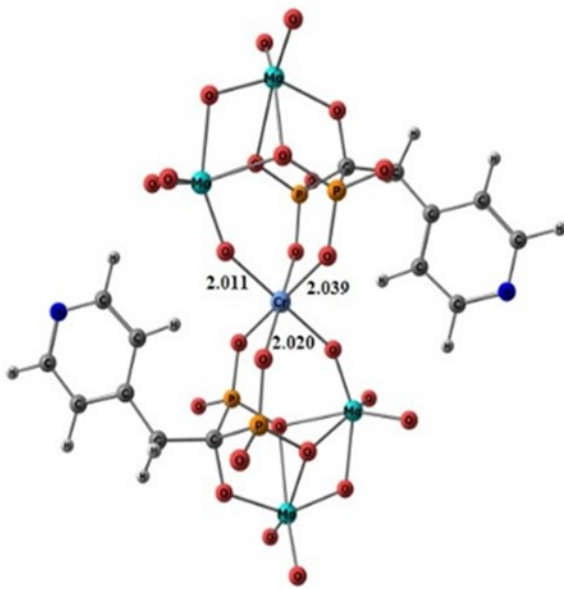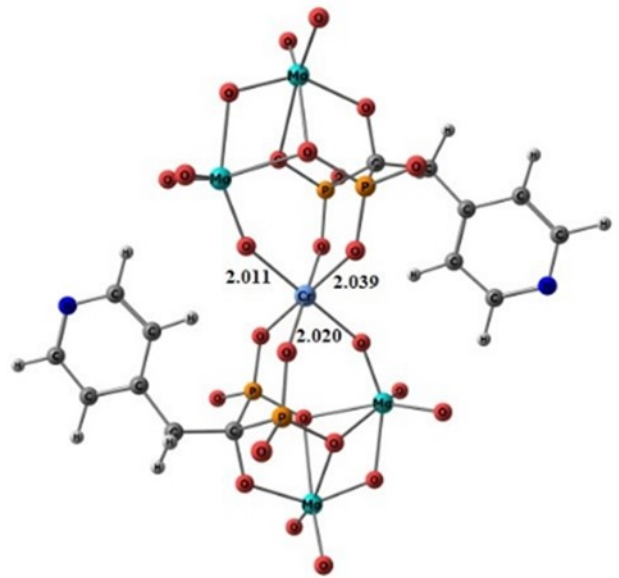

(b)

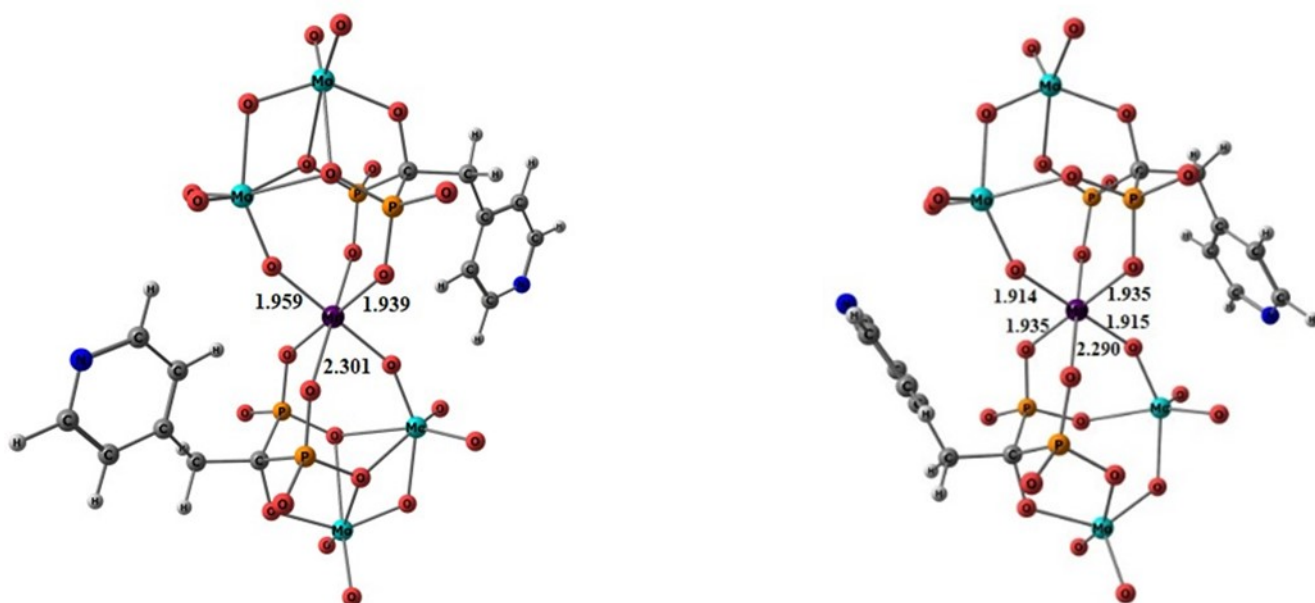

(c)

**Figure S5.** Optimized geometries in gas phase (left) and water medium (right) of polyanion **(a)**  $[(\text{Mo}^{\text{VI}}_2\text{O}_5)_2(\text{V}^{\text{III}}\text{O}_2)\{\text{O}_3\text{PC}(\text{O})(\text{CH}_2\text{-4-C}_5\text{NH}_4)\text{PO}_3\}_2]^{7-}$  (**1'**), for  $M = \text{V}^{\text{III}}$ ,  $S = 1$ ,  $q = -7$ ; **(b)**  $[(\text{Mo}^{\text{VI}}_2\text{O}_5)_2(\text{Cr}^{\text{III}}\text{O}_2)\{\text{O}_3\text{PC}(\text{O})(\text{CH}_2\text{-4-C}_5\text{NH}_4)\text{PO}_3\}_2]^{7-}$  (**2'**), for  $M = \text{Cr}^{\text{III}}$ ,  $S = 3/2$ ,  $q = -7$ ; **(c)**  $[(\text{Mo}^{\text{VI}}_2\text{O}_5)_2(\text{Mn}^{\text{III}}\text{O}_2)\{\text{O}_3\text{PC}(\text{O})(\text{CH}_2\text{-4-C}_5\text{NH}_4)\text{PO}_3\}_2]^{7-}$  (**3'**), for  $M = \text{Mn}^{\text{III}}$ ,  $S = 2$ ,  $q = -7$ ; at B3LYP-D3(BJ)/Def2-SVP level of theory. Bond lengths are in Å.

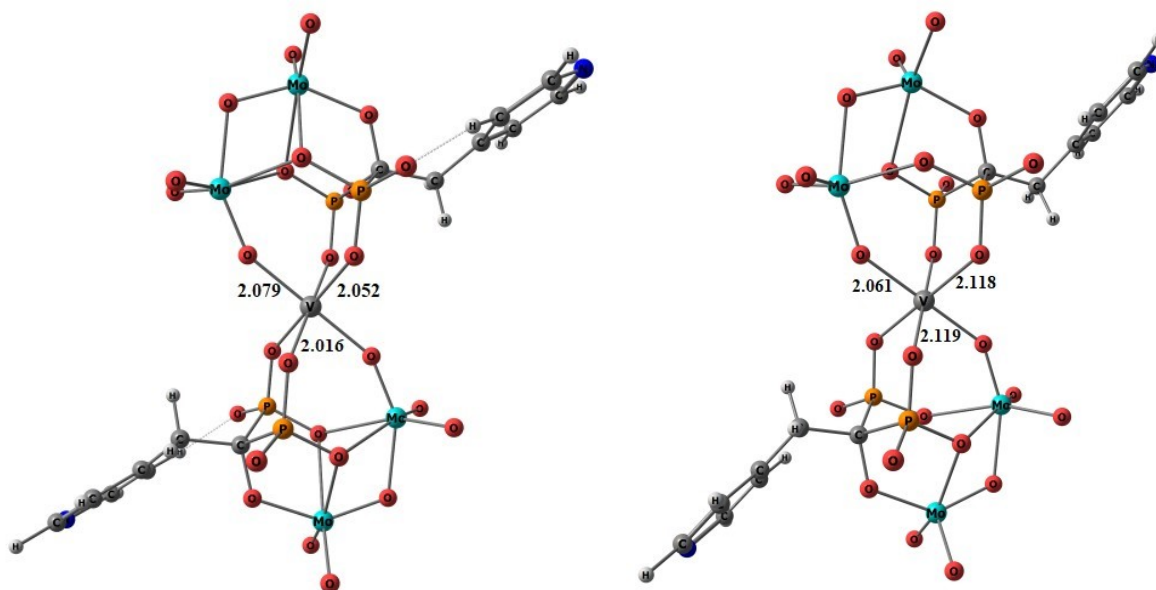

**Figure S6.** Optimized geometries in gas phase (left) and water medium (right) of polyanion  $[(\text{Mo}^{\text{VI}}\text{O}_5)_2(\text{V}^{\text{II}}\text{O}_2)\{\text{O}_3\text{PC}(\text{O})(\text{CH}_2\text{-4-C}_5\text{NH}_4)\text{PO}_3\}_2]^{8-}$  ( $\mathbf{1}'^-$ ) at B3LYP-D3(BJ)/Def2-SVP level of theory.  $M = \text{V}^{\text{II}}$  ( $\mathbf{1}'^-$ );  $S = 3/2$ ,  $q = -8$ . Bond lengths are in Å.

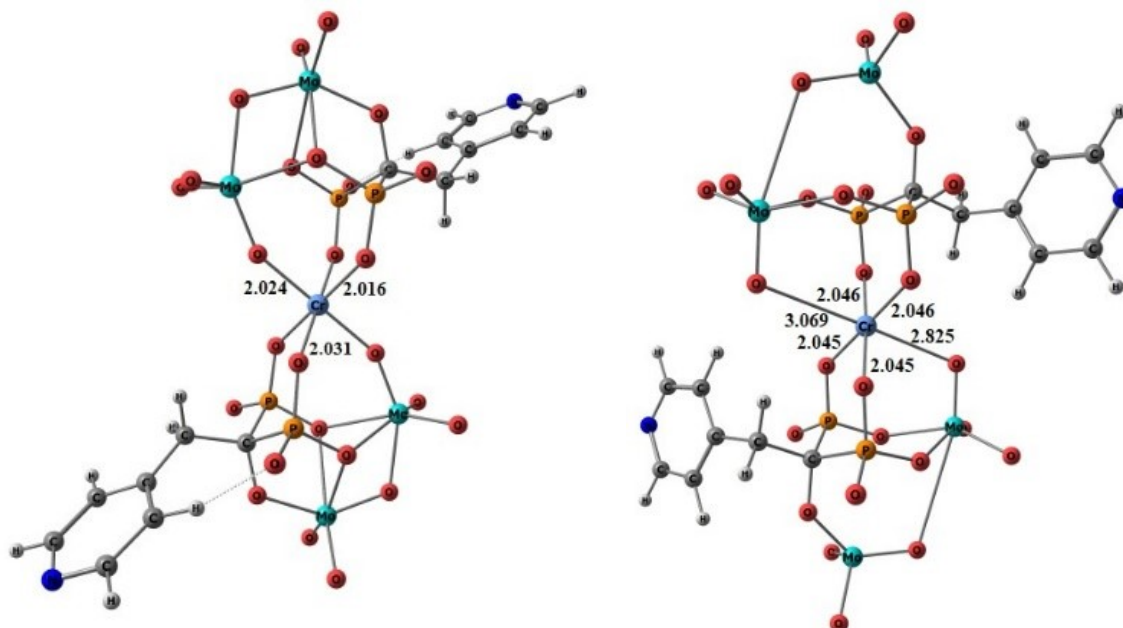

**Figure S7.** Optimized geometries in gas phase (left) and water medium (right) of polyanion  $[(\text{Mo}^{\text{VI}}\text{O}_5)_2(\text{Cr}^{\text{II}}\text{O}_2)\{\text{O}_3\text{PC}(\text{O})(\text{CH}_2\text{-4-C}_5\text{NH}_4)\text{PO}_3\}_2]^{8-}$  ( $\mathbf{2}'^-$ ) at B3LYP-D3(BJ)/def2-SVP level of theory.  $M = \text{Cr}^{\text{II}}$  ( $\mathbf{2}'^-$ );  $S = 2$ ,  $q = -8$ . Bond lengths are in Å.

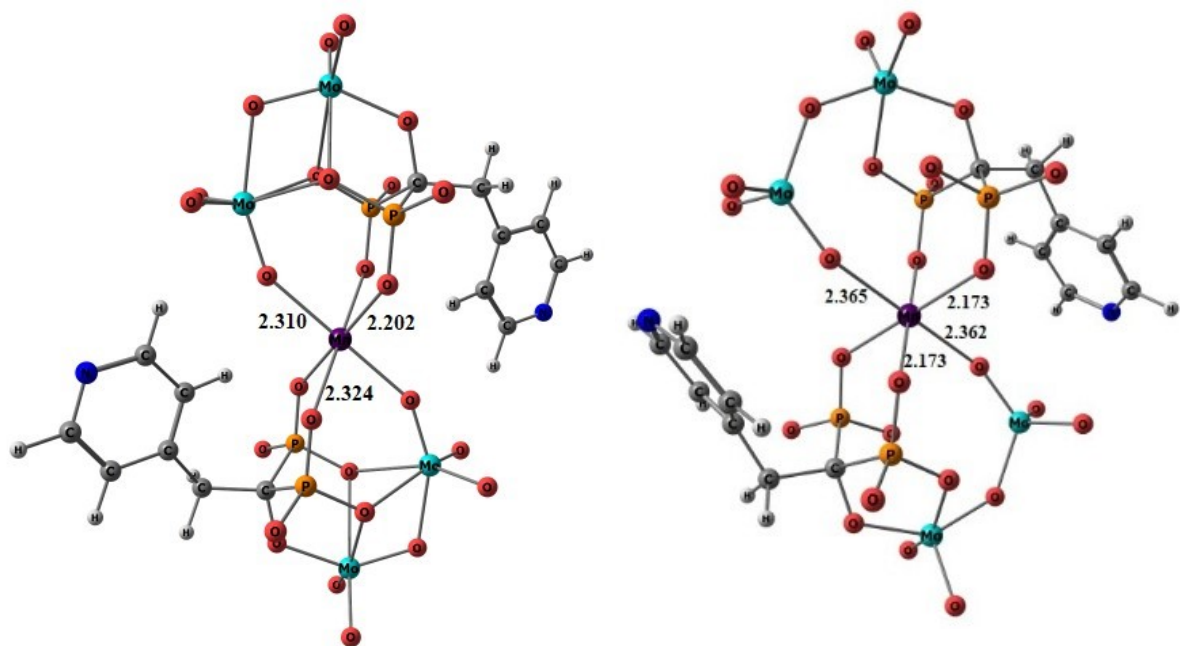

**Figure S8.** Optimized geometries in gas phase (left) and water medium (right) of polyanion  $[(\text{Mo}^{\text{VI}}\text{O}_5)_2(\text{Mn}^{\text{II}}\text{O}_2)\{\text{O}_3\text{PC}(\text{O})(\text{CH}_2\text{-4-C}_5\text{NH}_4)\text{PO}_3\}_2]^{8-}$  ( $\mathbf{3}'^-$ ) at B3LYP-D3(BJ)/Def2-SVP level of theory. M =  $\text{Mn}^{\text{II}}$  ( $\mathbf{3}'^-$ ); S = 5/2, q = -8. Bond lengths are in Å.

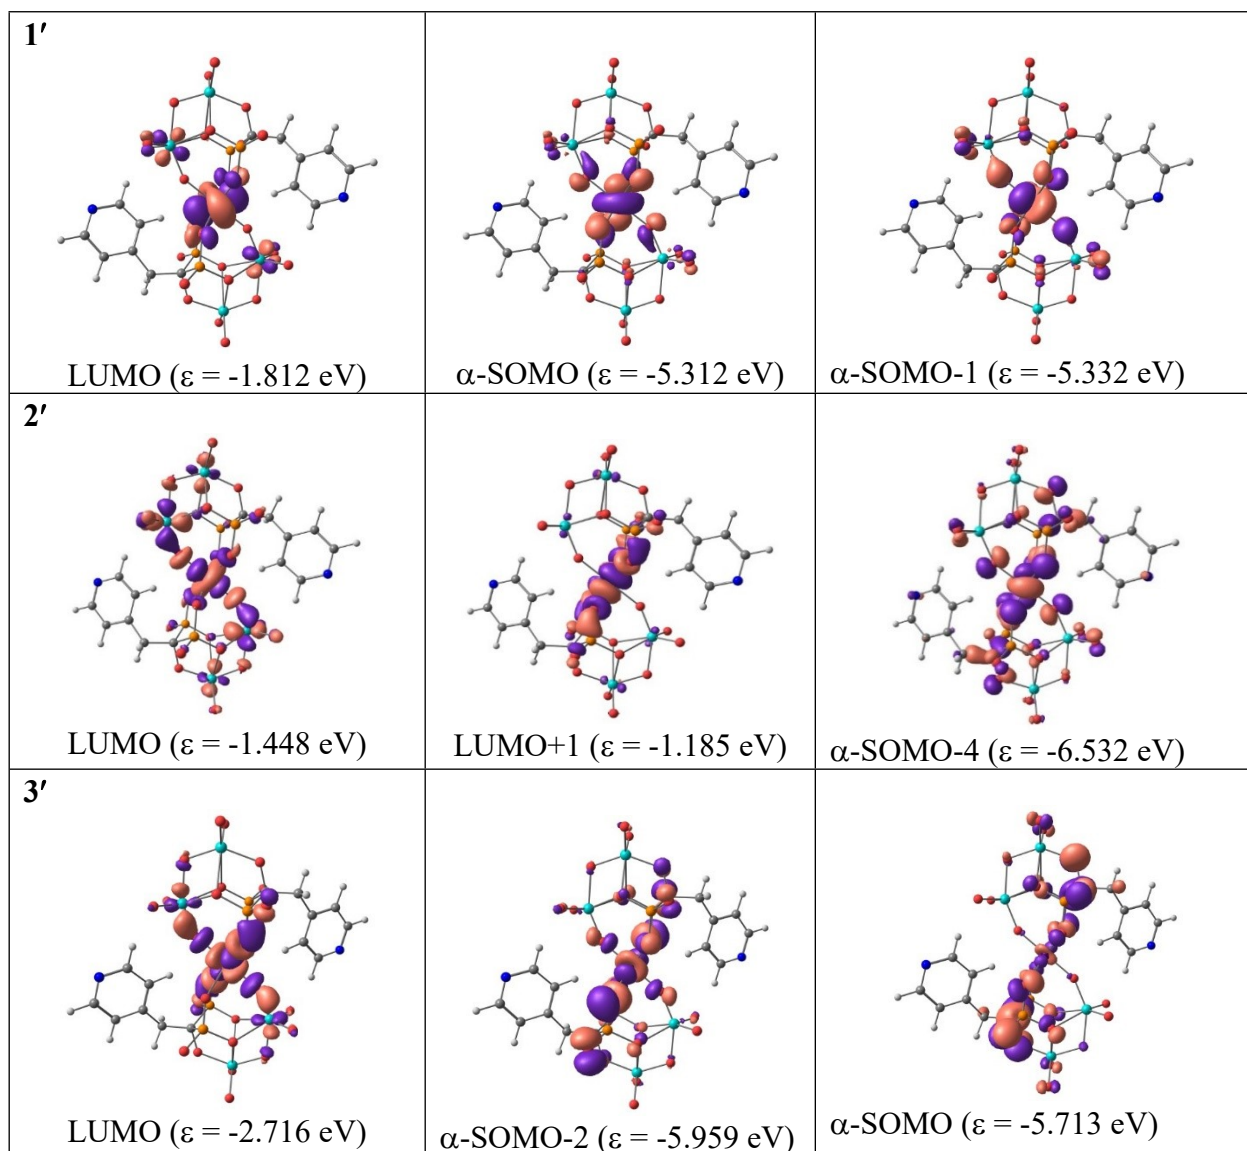

**Figure S9.** NBO figures of complexes  $[(\text{Mo}^{\text{VI}}\text{O}_5)_2(\text{M}^{\text{III}}\text{O}_2)\{\text{O}_3\text{PC}(\text{O})(\text{CH}_2\text{-4-C}_5\text{NH}_4)\text{PO}_3\}_2]^{7-}$

$\text{M}^{\text{III}} = \text{V}^{\text{III}}$  (**1'**),  $\text{Cr}^{\text{III}}$  (**2'**) and  $\text{Mn}^{\text{III}}$  (**3'**) at B3LYP-D3(BJ)/Def2-SVP level of theory in the

water medium.



**Table S7: Hydrogen-bonding parameters for compound 1a**

| Donor - H ... Acceptor      | D - H (Å) | H ... A (Å) | D ... A (Å) |
|-----------------------------|-----------|-------------|-------------|
| C4 - H4...O2B <sup>#1</sup> | 0.93      | 2.52        | 3.097       |
| C4 - H4...O2A <sup>#1</sup> | 0.93      | 2.40        | 3.179       |

Symmetry transformations used to generate equivalent atoms:

$$\#1: \frac{1}{2} - x, -\frac{1}{2} + y, \frac{1}{2} - z$$

**Table S8: Hydrogen-bonding parameters for compound 2a**

| Donor - H ... Acceptor       | D - H (Å) | H ... A (Å) | D ... A (Å) |
|------------------------------|-----------|-------------|-------------|
| C2 - H2B...O2A <sup>#1</sup> | 0.97      | 2.44        | 3.362       |
| C5 - H5...N1H <sup>#2</sup>  | 0.93      | 2.47        | 3.140       |
| C6 - H6...O2A <sup>#3</sup>  | 0.93      | 2.40        | 3.050       |

Symmetry transformations used to generate equivalent atoms:

$$\#1: \frac{3}{2} - x, -\frac{1}{2} + y, \frac{1}{2} - z$$

$$\#2: 1 - x, -y, -z$$

$$\#3: -\frac{1}{2} + x, \frac{1}{2} - y, -\frac{1}{2} + z$$

**Table S9: Hydrogen-bonding parameters for compound 3a**

| Donor - H ... Acceptor       | D - H (Å) | H ... A (Å) | D ... A (Å) |
|------------------------------|-----------|-------------|-------------|
| C2 - H2A...O2A <sup>#1</sup> | 0.99      | 2.46        | 3.432       |
| C5 - H5...O2A <sup>#2</sup>  | 0.95      | 2.44        | 3.145       |

Symmetry transformations used to generate equivalent atoms:

$$\#1: \frac{3}{2} - x, \frac{1}{2} + y, \frac{1}{2} - z$$

$$\#2: \frac{1}{2} + x, \frac{1}{2} - y, \frac{1}{2} + z$$

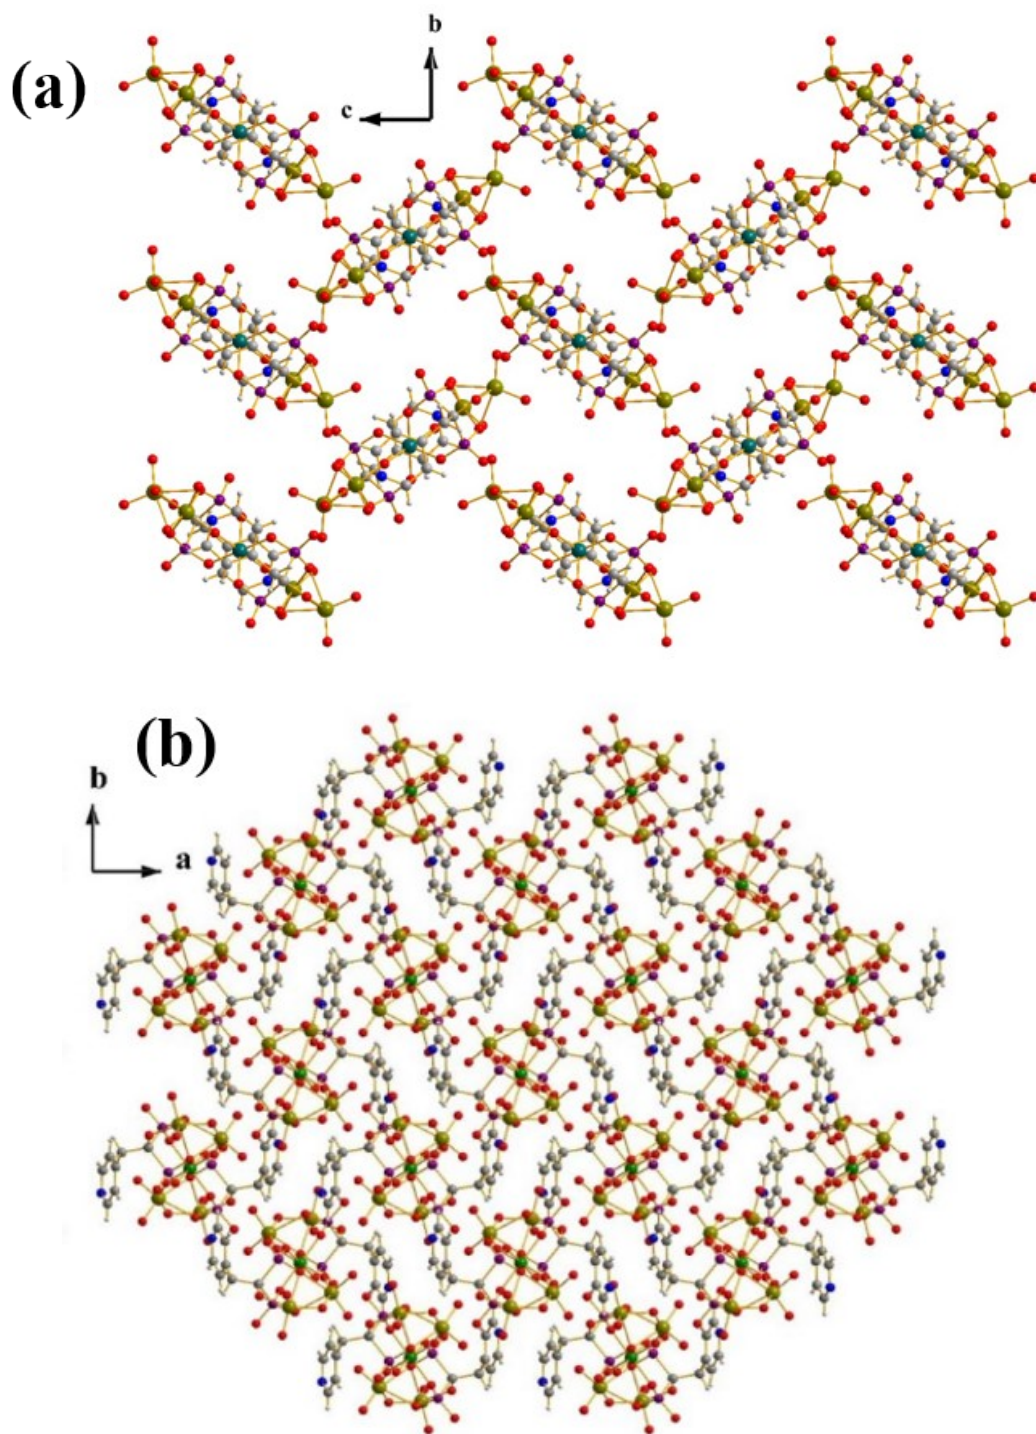

**Figure S10.** Crystal packing arrangement for polyanions **1**, **2** and **3** **(a)** of along the a-axis, **(b)** along the c-axis.

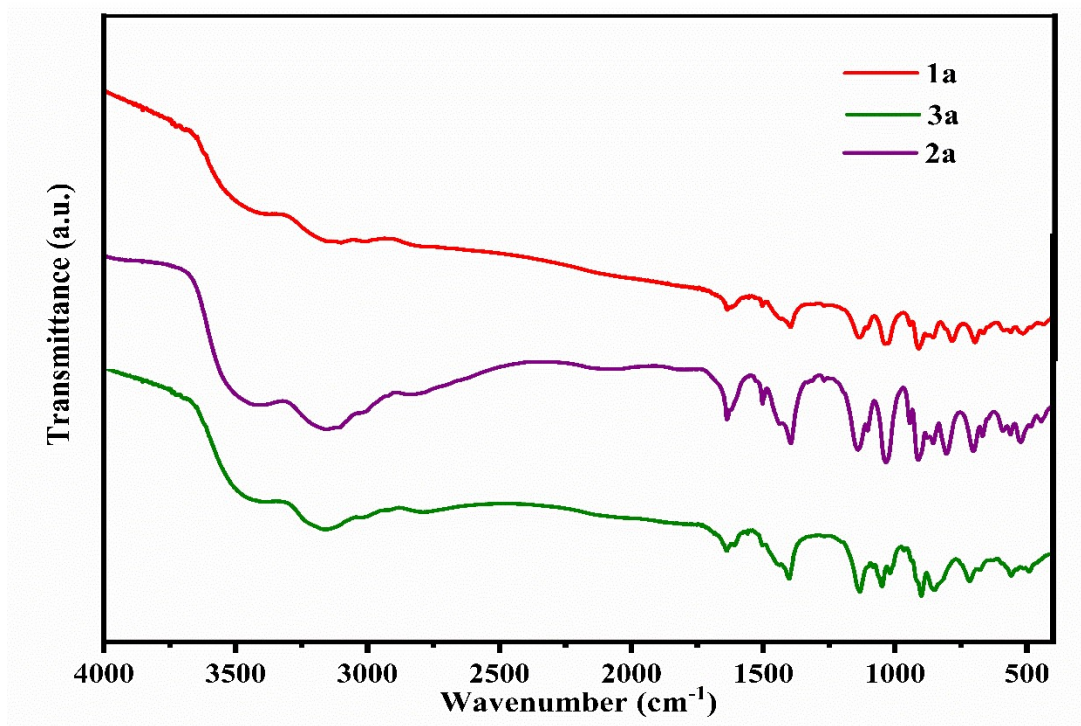

(a)

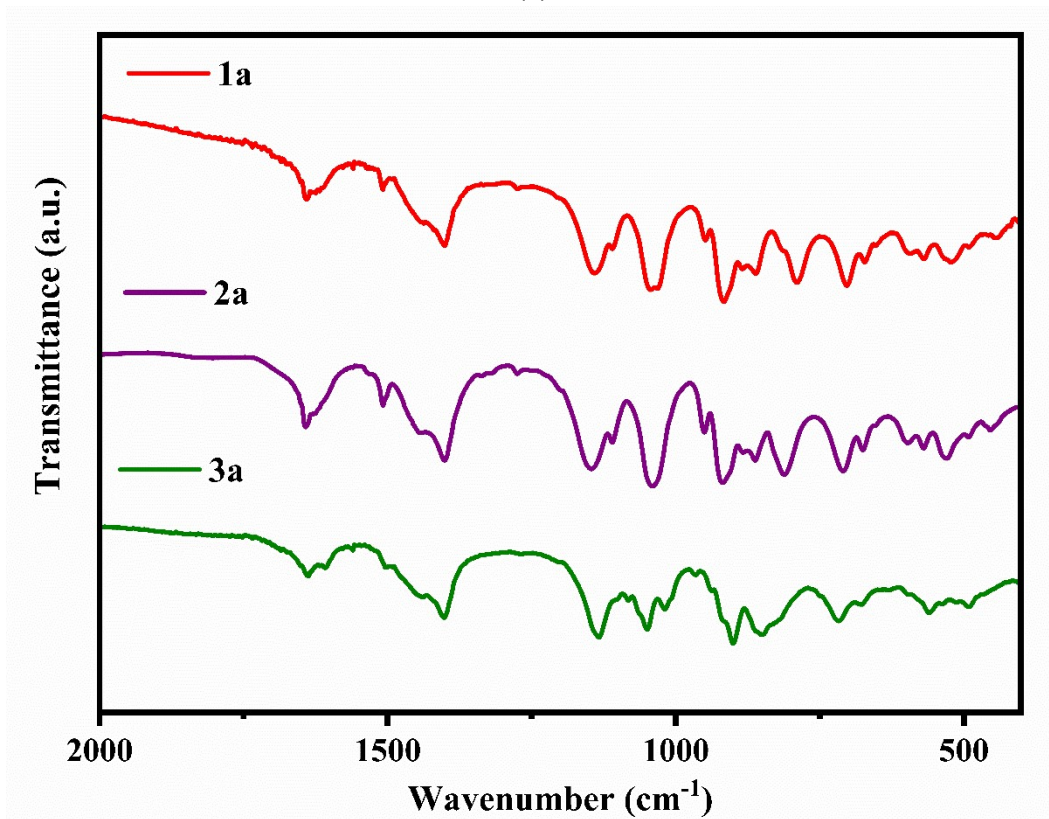

(b)

Figure S11. Comparative infrared spectra of compound 1a – 3a, (a) complete spectra, (b) fingerprint region.

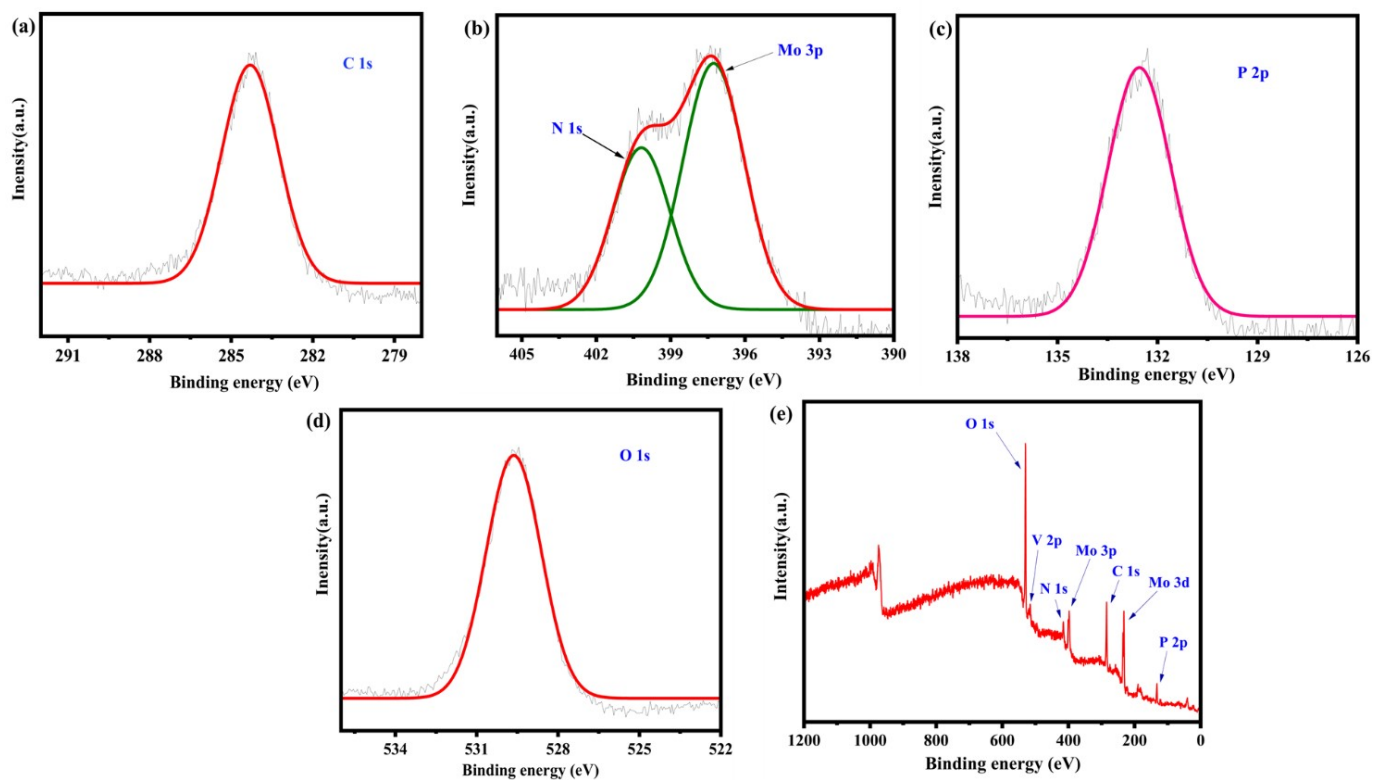

**Figure S12.** XPS Spectra of compound **1a**, (a) C 1s, (b) Mo 3p and N 1s, (c) P 2p, (d) O 1s and, (e) Survey spectrum.

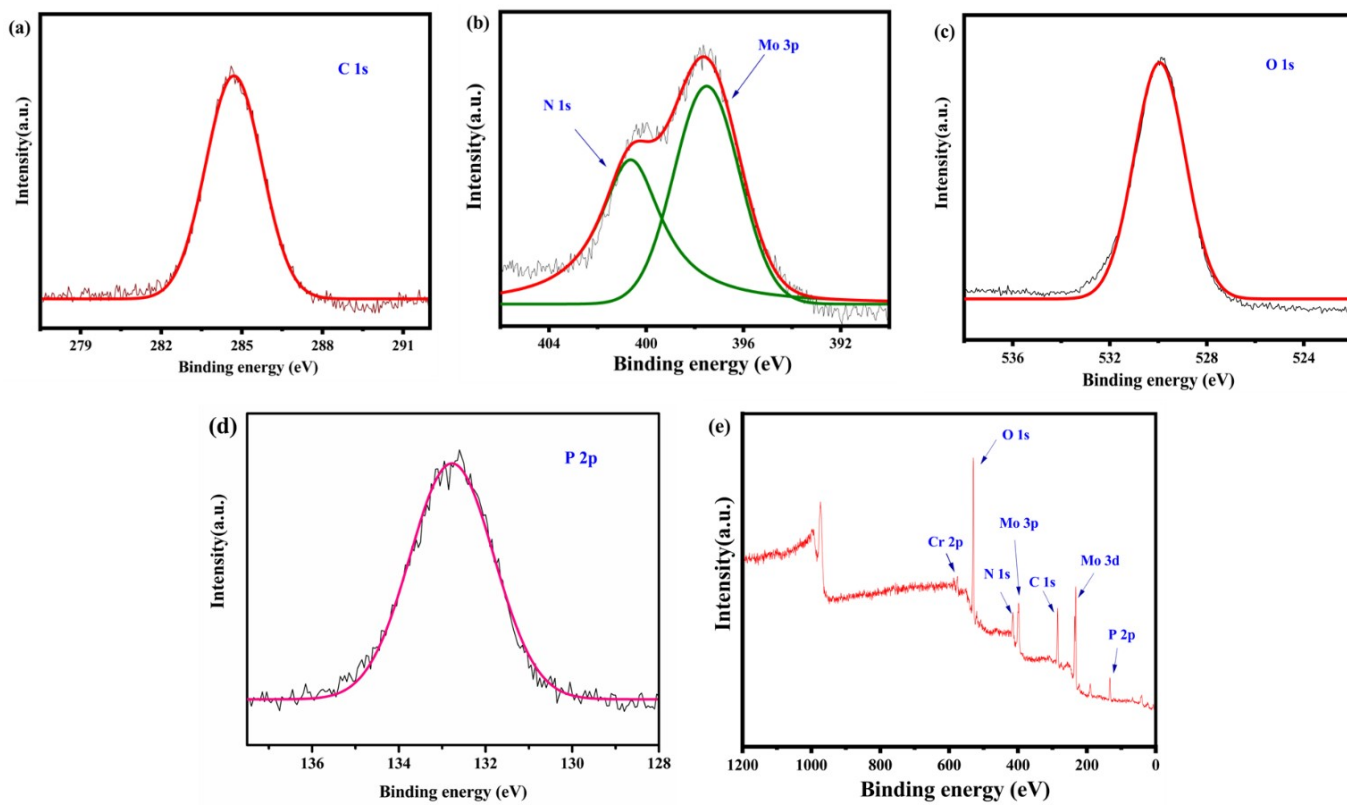

**Figure S13.** XPS Spectra of compound **2a**, (a) C 1s, (b) Mo 3p and N 1s, (c) O 1s, (d) P 2p and, (e) Survey spectrum.

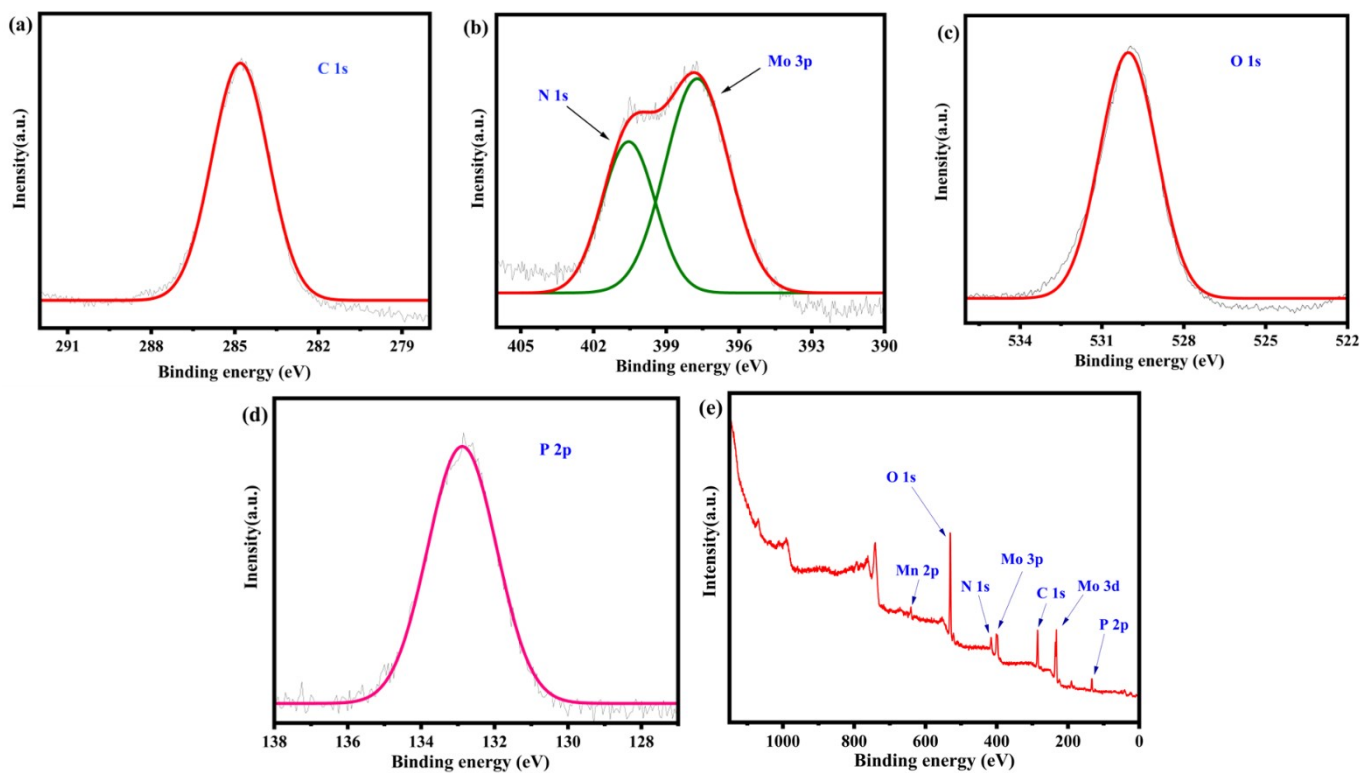

**Figure S14.** XPS Spectra of compound **3a**, (a) C 1s, (b) Mo 3p and N 1s, (c) O 1s, (d) P 2p and, (e) Survey spectrum.

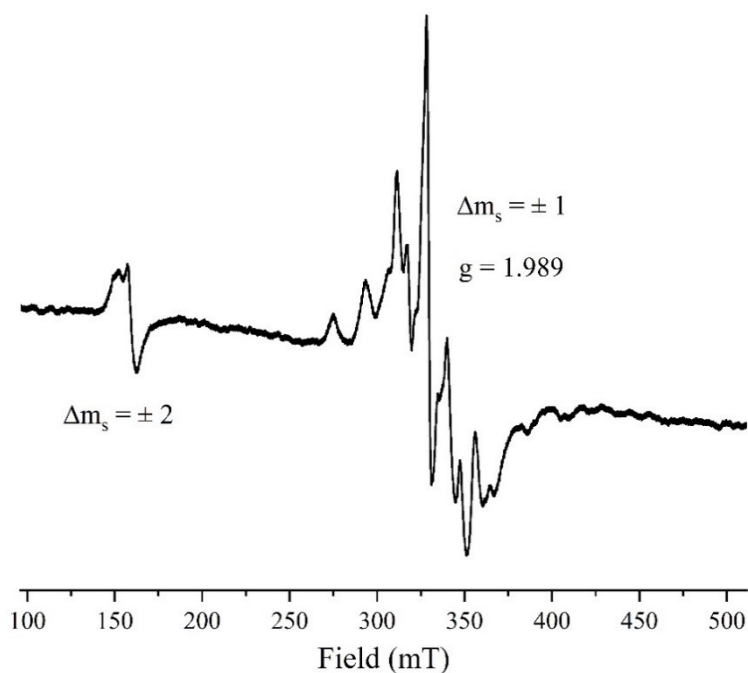

(a)

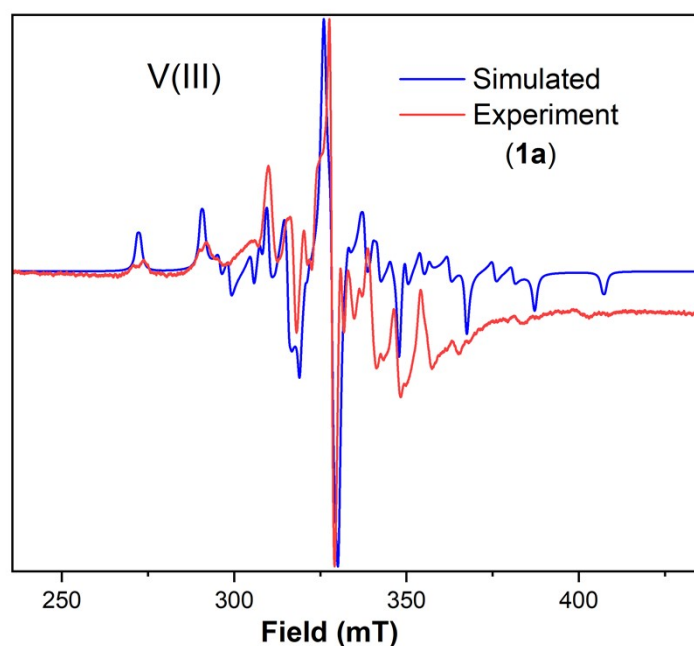

(b)

**Figure S15.** X-band EPR spectra of the complex

$\text{Na}_2(\text{NH}_4)_5[(\text{Mo}^{\text{VI}}\text{O}_5)_2(\text{V}^{\text{III}}\text{O}_2)\{\text{O}_3\text{PC}(\text{O})(\text{CH}_2\text{-4-C}_5\text{NH}_4)\text{PO}_3\}_2]\cdot 10\text{H}_2\text{O}$  (**1a**;  $\text{V}^{\text{III}}$ ,  $3d^2$ ) ( $S = 1$ ) in the solid state at 77 K. Frequency 9.185 GHz. EPR spectrum (red, **1a**) of V(III)-complex in solid state at 77 K. Red and blue lines represent the experimental and simulated spectra of V(III)-complex using EasySpin program. [ $g_x = 1.9907$ ,  $g_y = 1.99908$ ,  $g_z = 2.03178$ ,  $\text{LWPP}(1) = 0.2199$  mT,  $\text{LWPP}(2) = 0.8177$  mT,  $A_x = 537.269$  MHz,  $A_y = 322.895$  MHz,  $A_z = 190.087$  MHz]

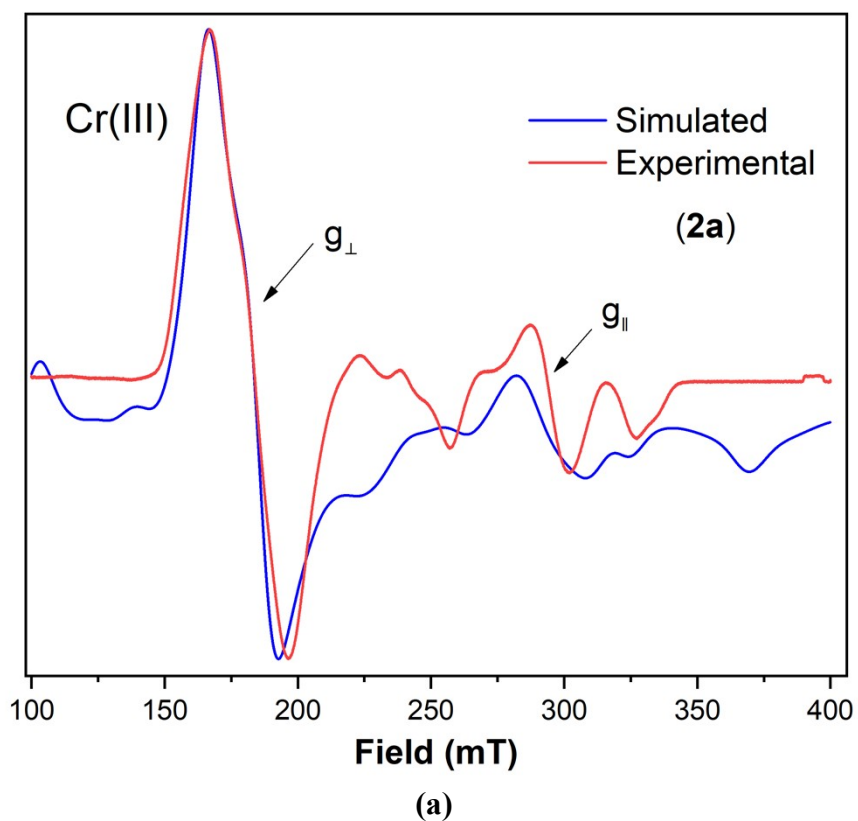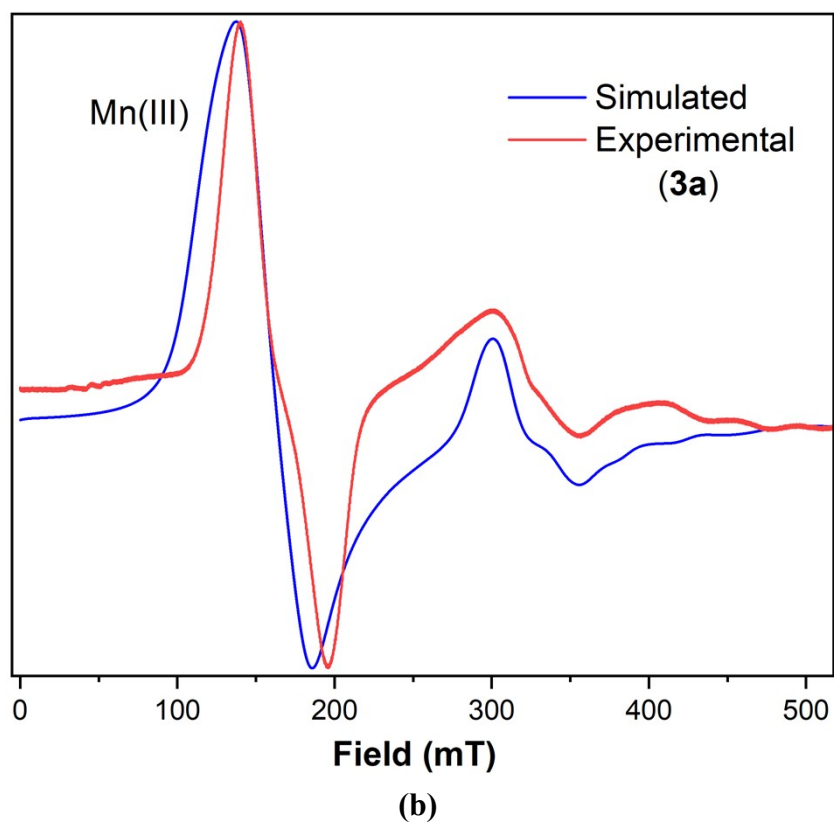

**Figure S16.** X-band EPR spectra, in the solid state at 77 K, of the complex (a)  $(\text{NH}_4)_5[\text{H}_2(\text{Mo}^{\text{VI}}_2\text{O}_5)_2(\text{Cr}^{\text{III}}\text{O}_2)\{\text{O}_3\text{P}-\text{C}(\text{O})(\text{CH}_2-4-\text{C}_5\text{H}_4\text{N})-\text{PO}_3\}_2]\cdot 10\text{H}_2\text{O}$  (**2a**;  $\text{Cr}^{\text{III}}$ ,  $3d^3$ ) ( $S = 3/2$ ) at frequency 9.182 GHz. EPR spectrum (red, **2a**) of Cr(III)-complex in solid state at 77



K. Red and blue lines represent the experimental and simulated spectra using EasySpin program. [ $g_x = 1.9186$ ,  $g_y = 2.1300$ ,  $g_z = 2.01047$ , LWPP (Gaussian broadening) = 8.0187 mT, LWPP (Lorentzian broadening) = 4.25418 mT,  $A_x = 428.001$  MHz,  $A_y = 36.7313$  MHz,  $A_z = 237.35$  MHz]. (b)  $\text{Na}(\text{NH}_4)_6[\text{H}(\text{Mo}^{\text{VI}}_2\text{O}_5)_2(\text{Mn}^{\text{III}}\text{O}_2)\{\text{O}_3\text{P}-\text{C}(\text{O})(\text{CH}_2-4-\text{C}_5\text{H}_4\text{N})-\text{PO}_3\}_2]\cdot 9\text{H}_2\text{O}$  (**3a**;  $\text{Mn}^{\text{III}}$ ,  $3d^4$ ) ( $S = 2$ ) at frequency 9.184 GHz. EPR spectrum (red, **3a**) of Mn(III)-complex in solid state at 77 K. Red and blue lines represent the experimental and simulated spectra using EasySpin program. [ $g_x = 1.99472$ ,  $g_y = 1.44941$ ,  $g_z = 1.9210$ , LWPP (Gaussian broadening) = 7.02521 mT, LWPP (Lorentzian broadening) = 11.3037 mT,  $A_x = 190.484$  MHz,  $A_y = 190.484$  MHz,  $A_z = 97.143$  MHz,  $D = 0.59\text{cm}^{-1}$ ,  $E = 0.038\text{cm}^{-1}$ ].

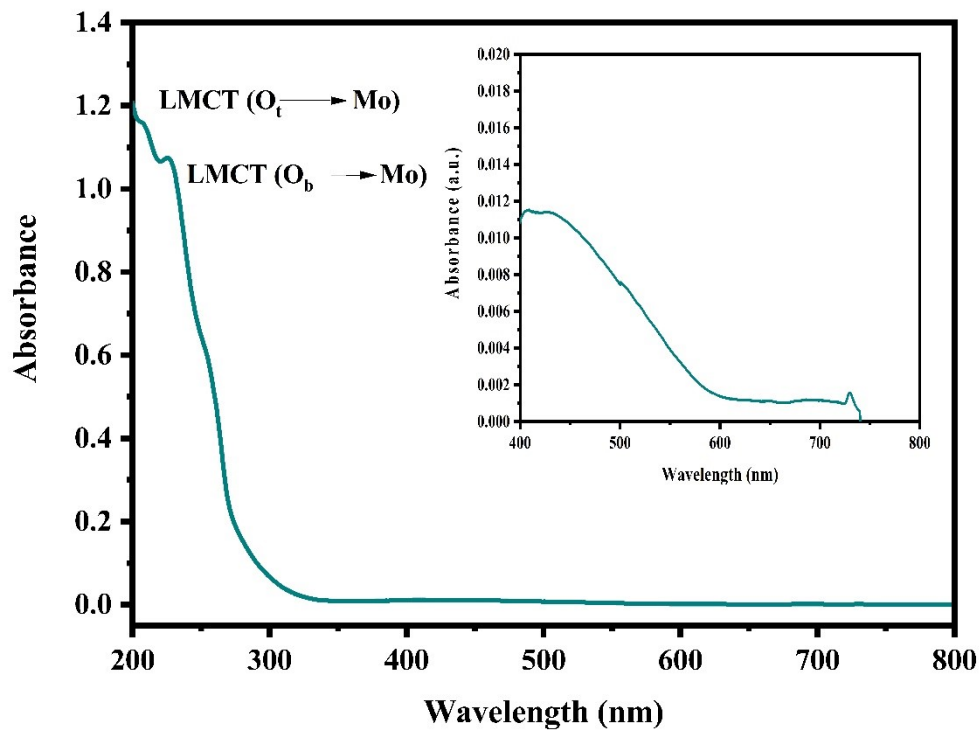

(a)

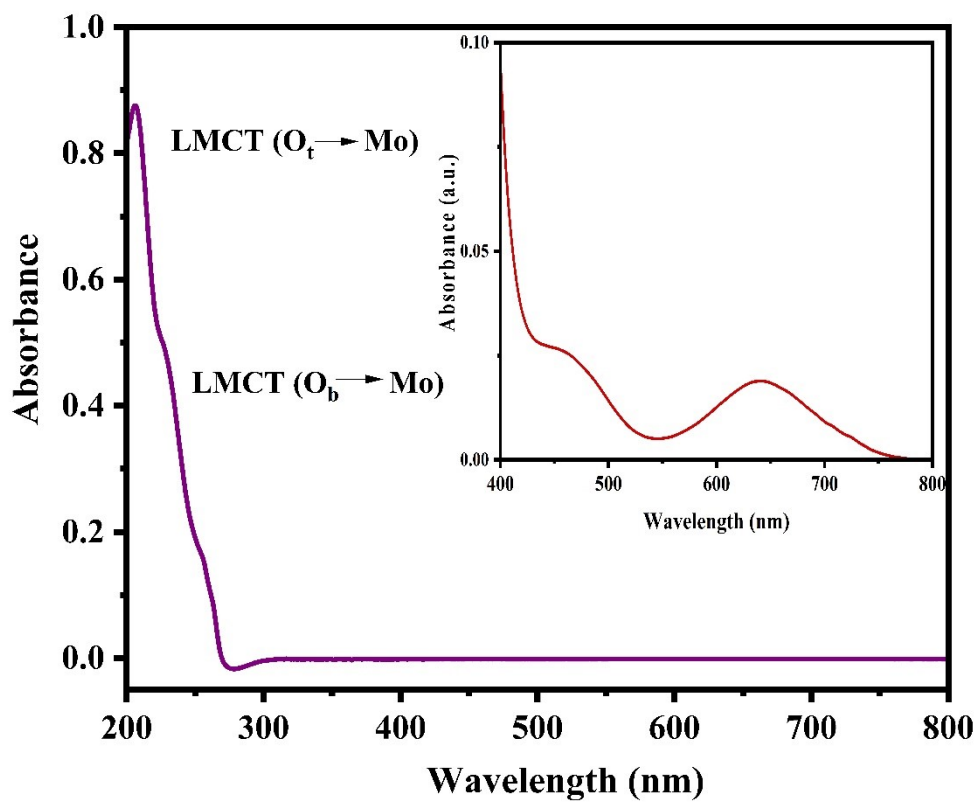

(b)

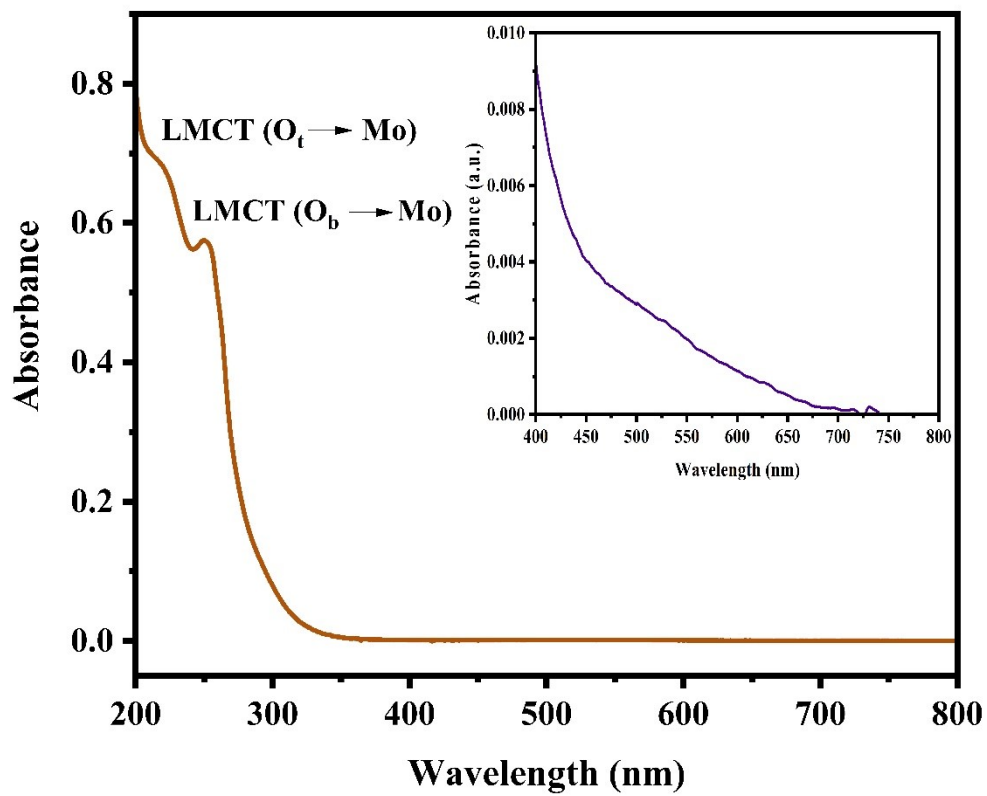

(c)

Figure S17. UV- Visible spectra in water of compounds (a) 1a, (b) 2a and, (c) 3a.

TD-DFT calculations at B3LYP/def2svp level of theory:

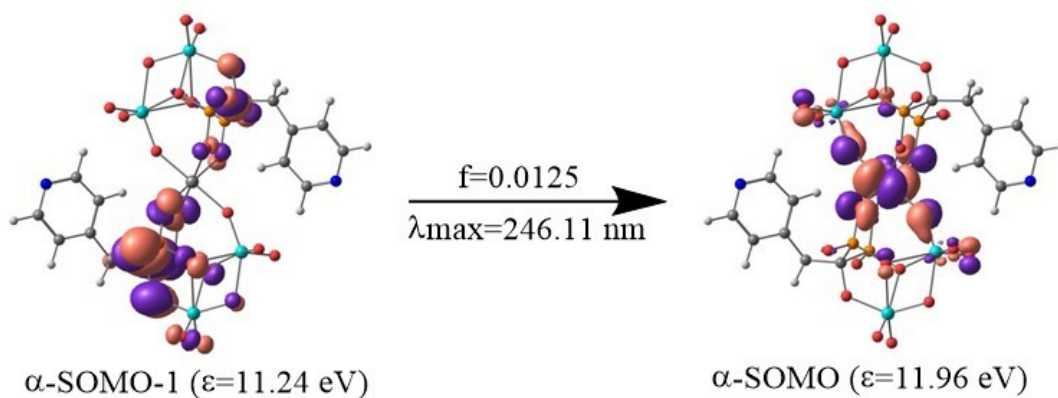

Figure S18. TD -DFT results of V(III)-complex (1a).

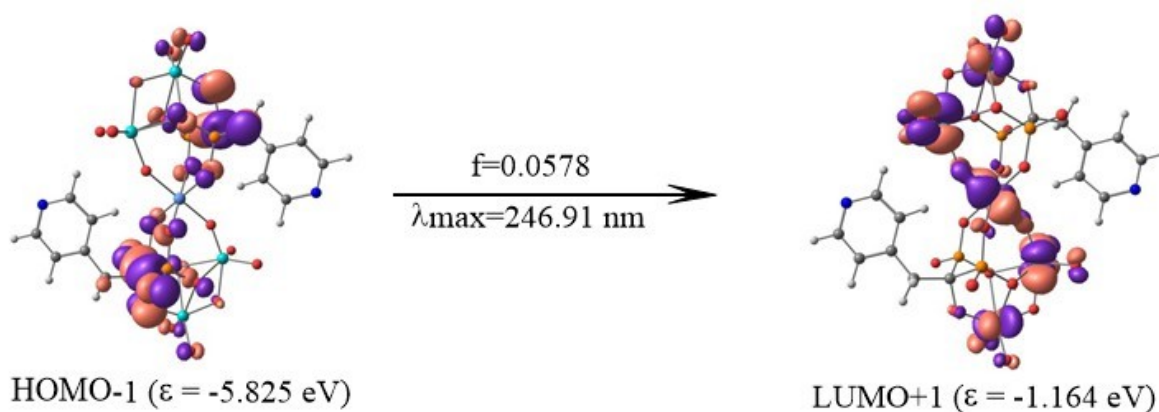

Figure S19. TD -DFT results of Cr(III)-complex (2a).

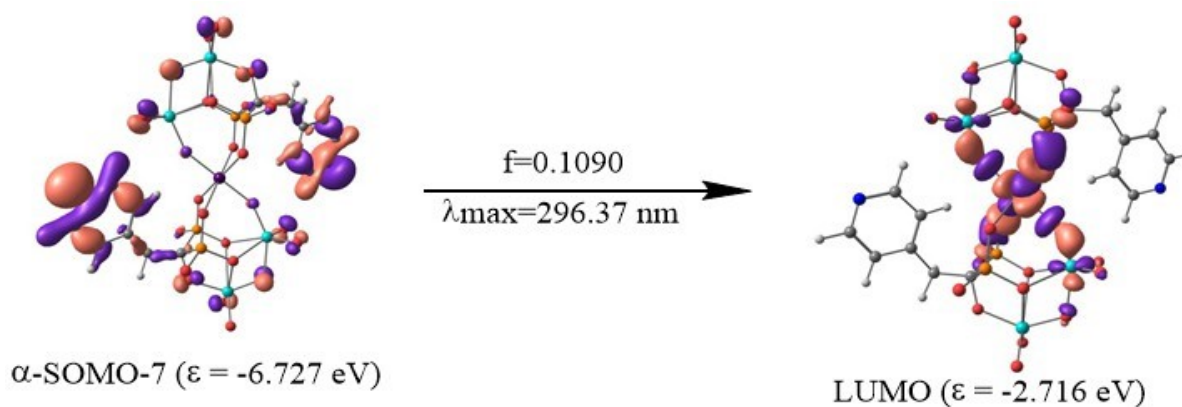

Figure S20. TD -DFT results of Mn(III) complex (3a).

TD DFT Results (TDDFT in B3LYP/Def2SVP) (optimised in B3LYP/def2tzvpp)

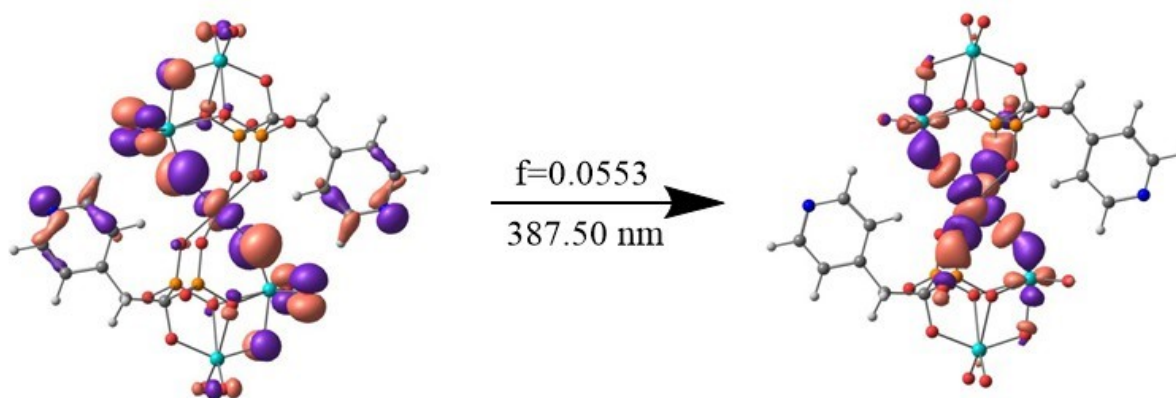

Figure S21. TD DFT results of Mn(III) complex (**3a**).

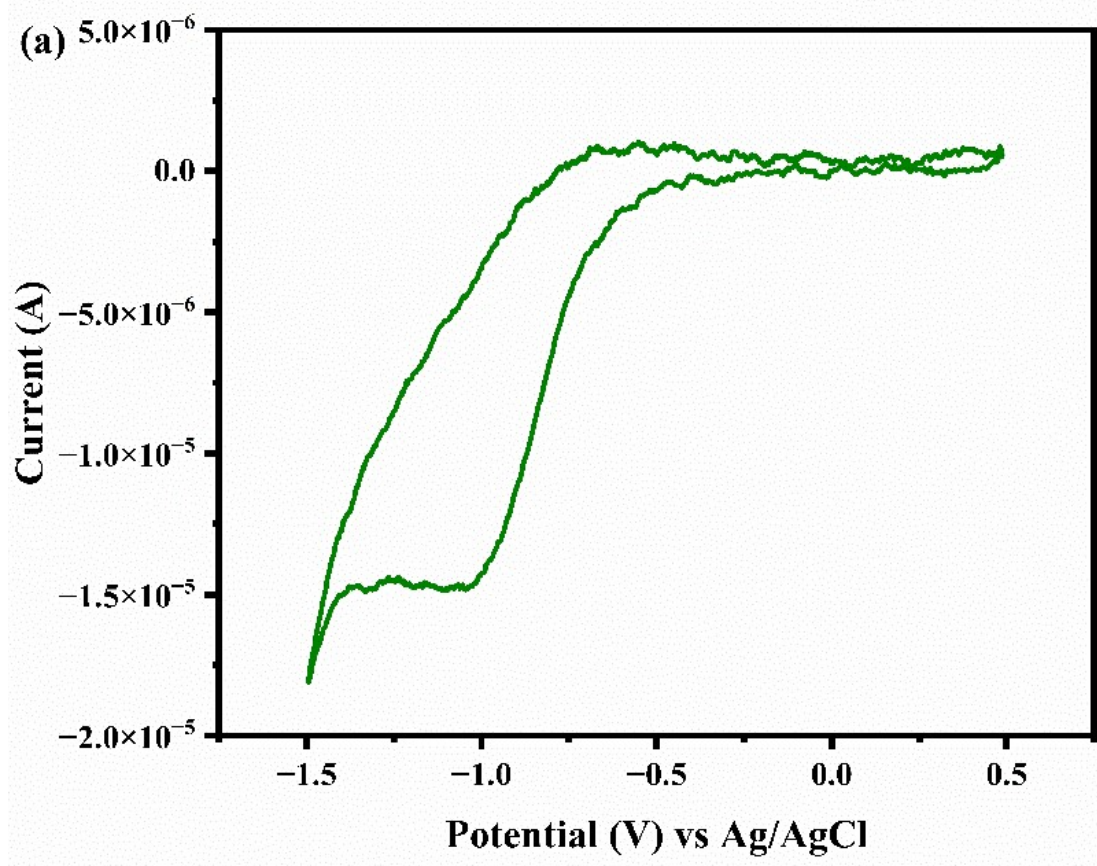

(a)

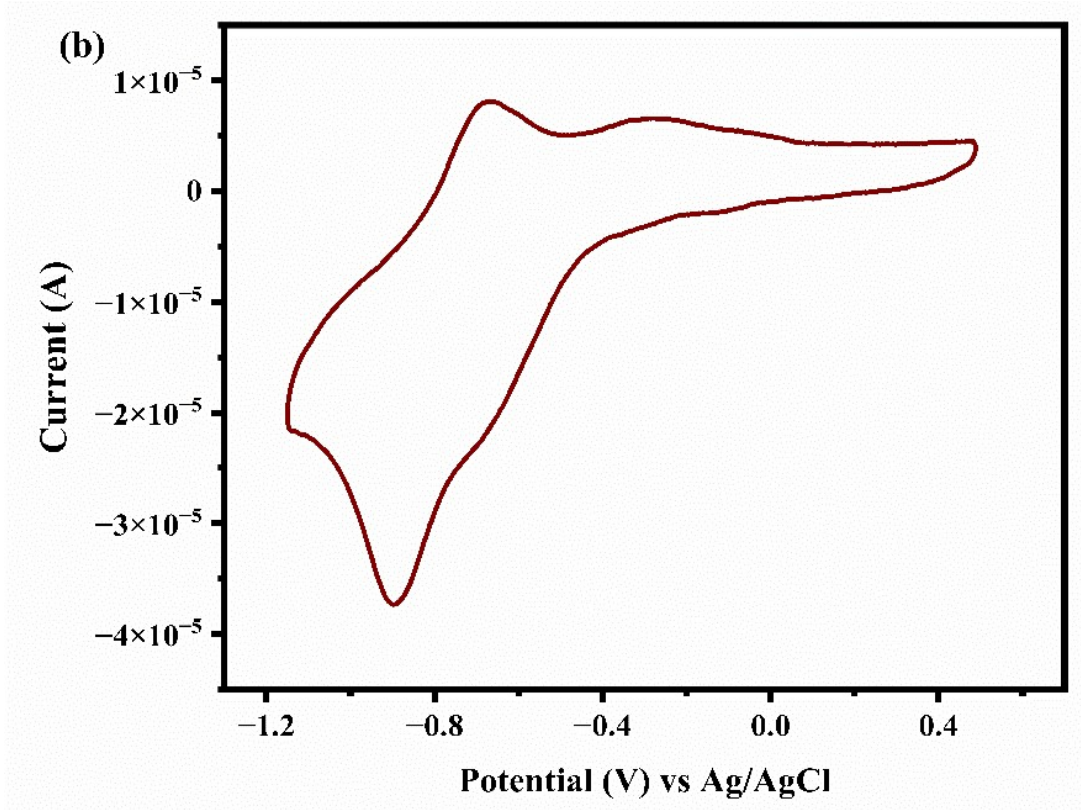

(b)

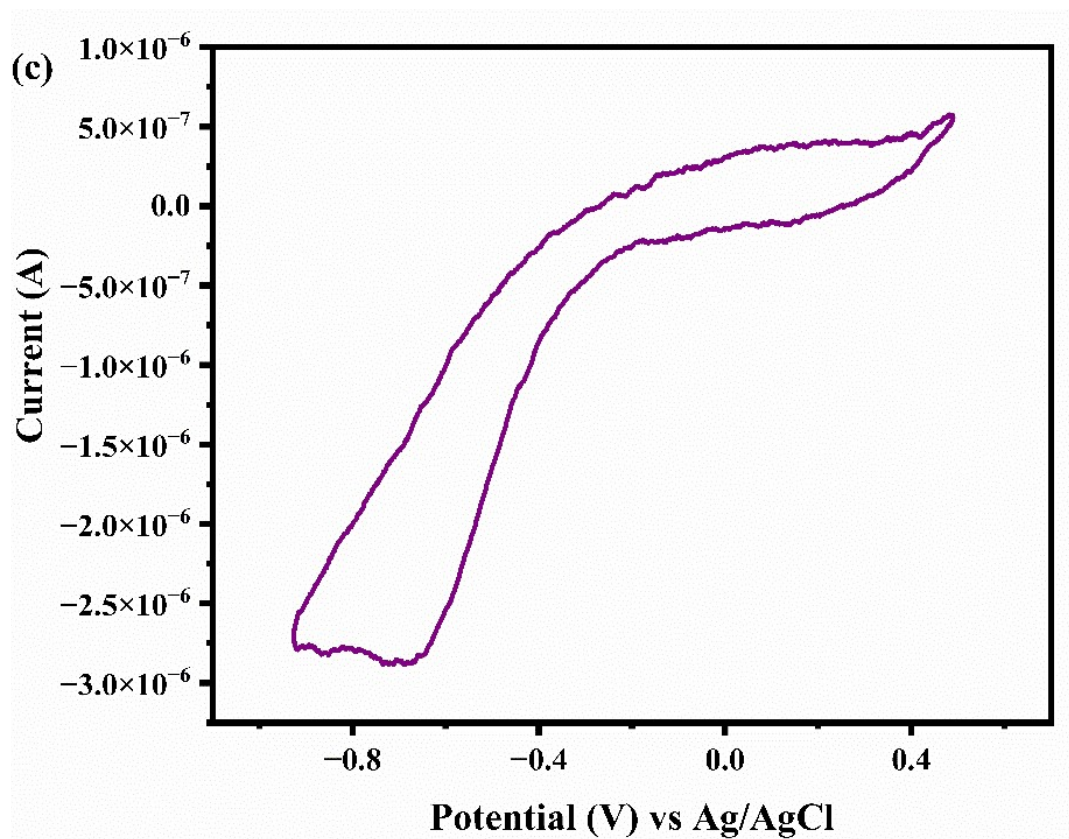

(c)

**Figure S22.** Electrochemical cyclic voltammogram curves for compounds (a) **1a**, (b) **2a**, and (c) **3a** in solution of 0.5M NaClO<sub>4</sub> in the ternary solvent mixture of ethylene carbonate, propylene carbonate, and ethyl acetate in the volume ratio of 1:1:1.

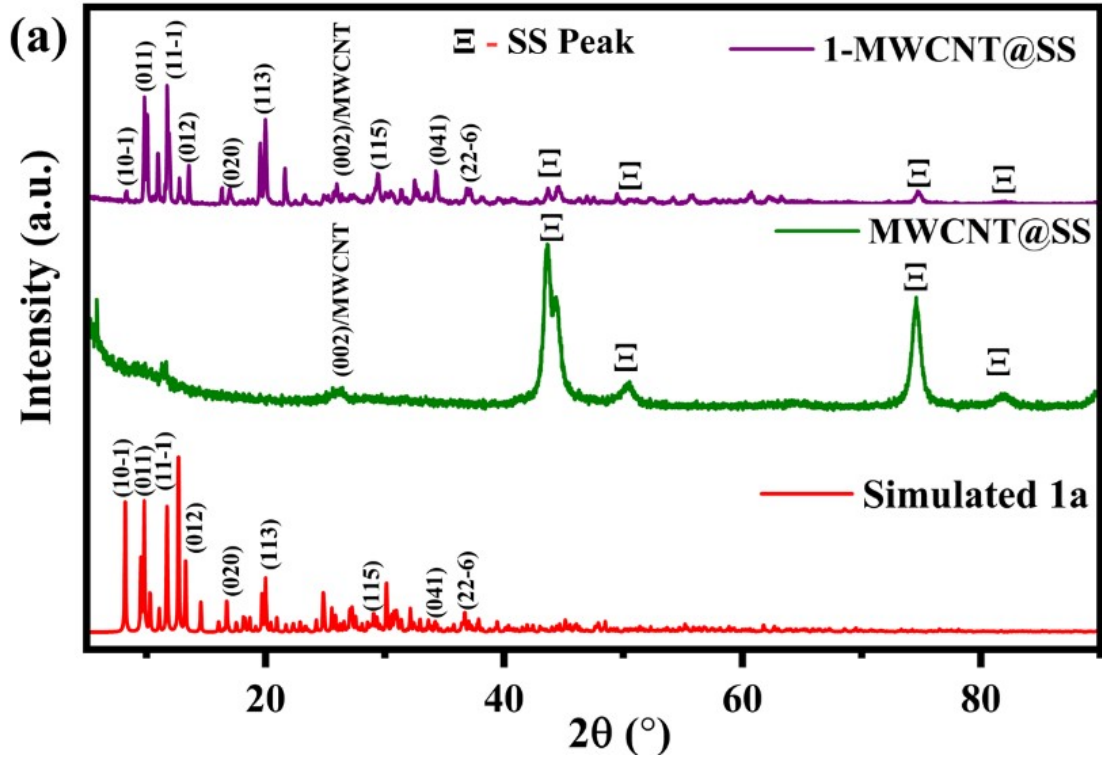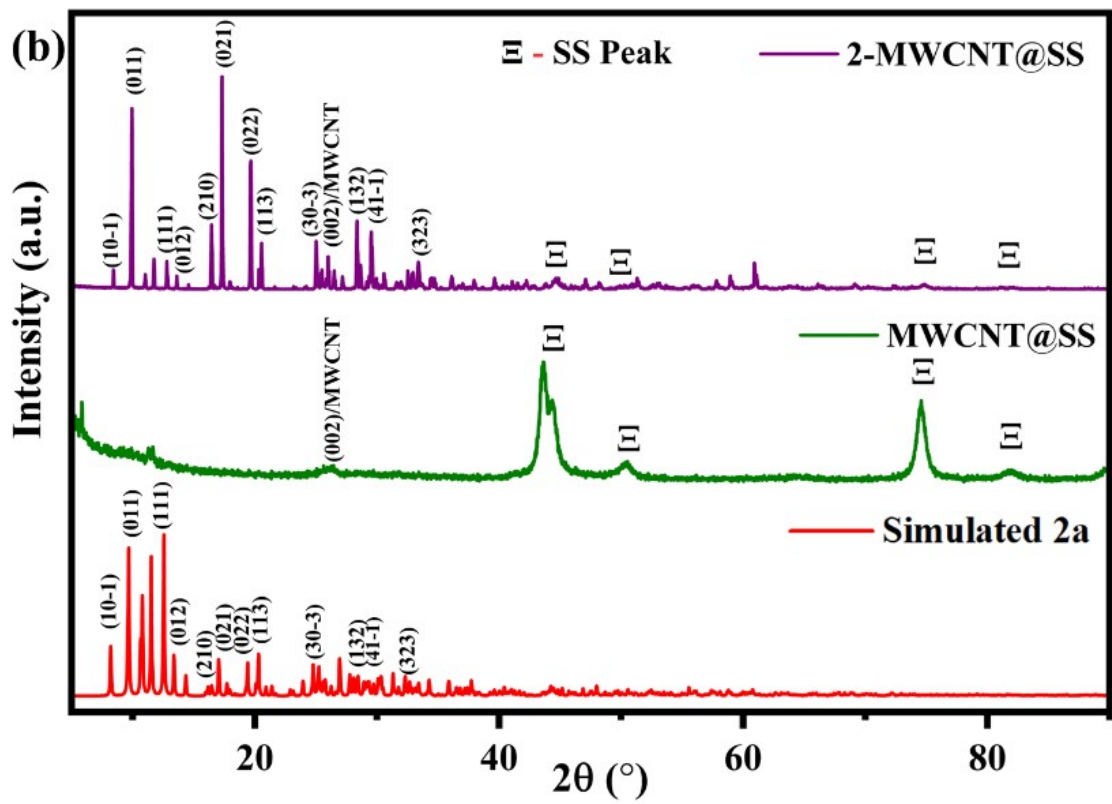



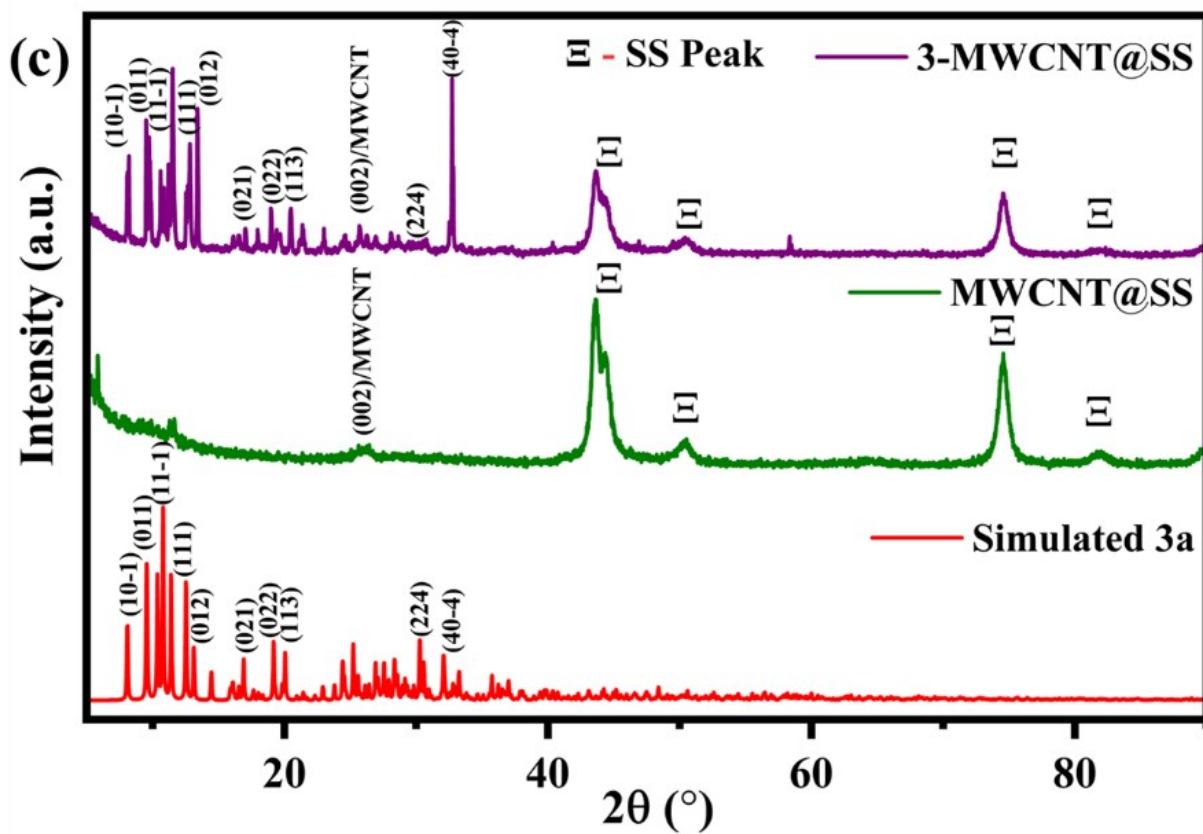

**Figure S23.** Comparative PXRD patterns of (a) simulated P-XRD pattern of **1a**, MWCNT@SS and 1-MWCNT@SS, (b) simulated P-XRD pattern of **2a**, MWCNT@SS and 2-MWCNT@SS, (c) simulated P-XRD pattern of **3a**, MWCNT@SS and 3-MWCNT@SS.

SS = Stainless steel.

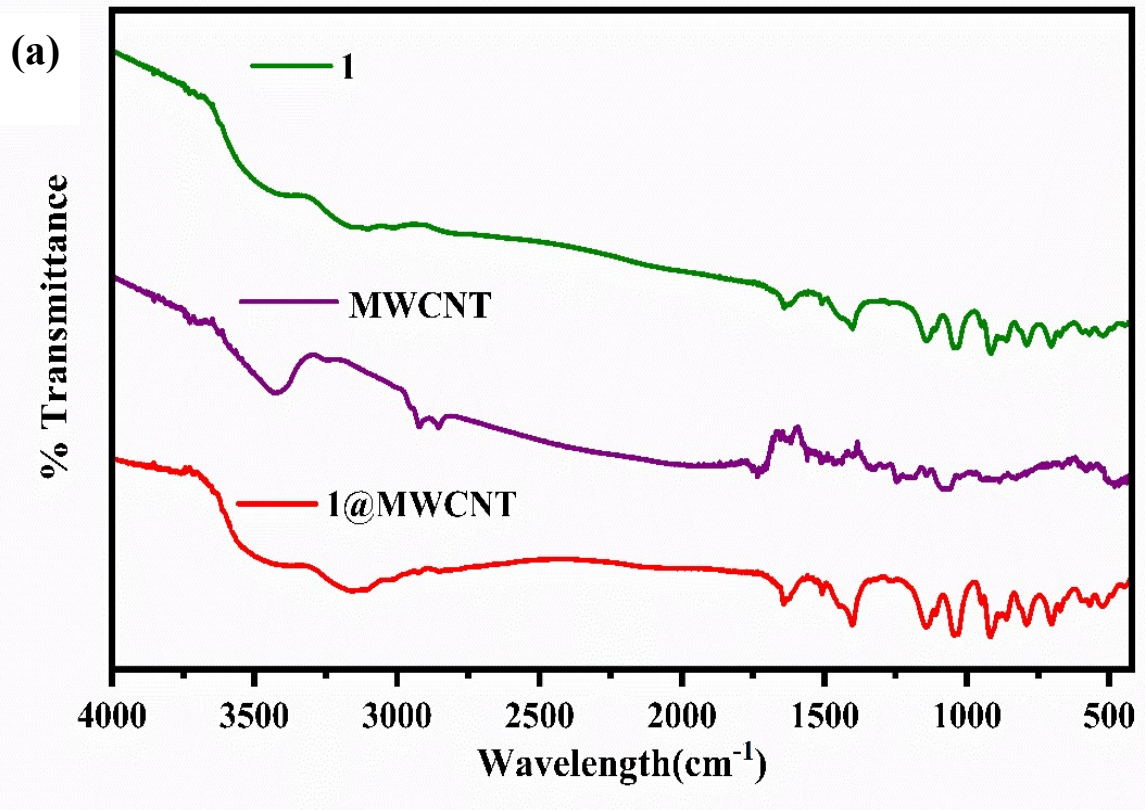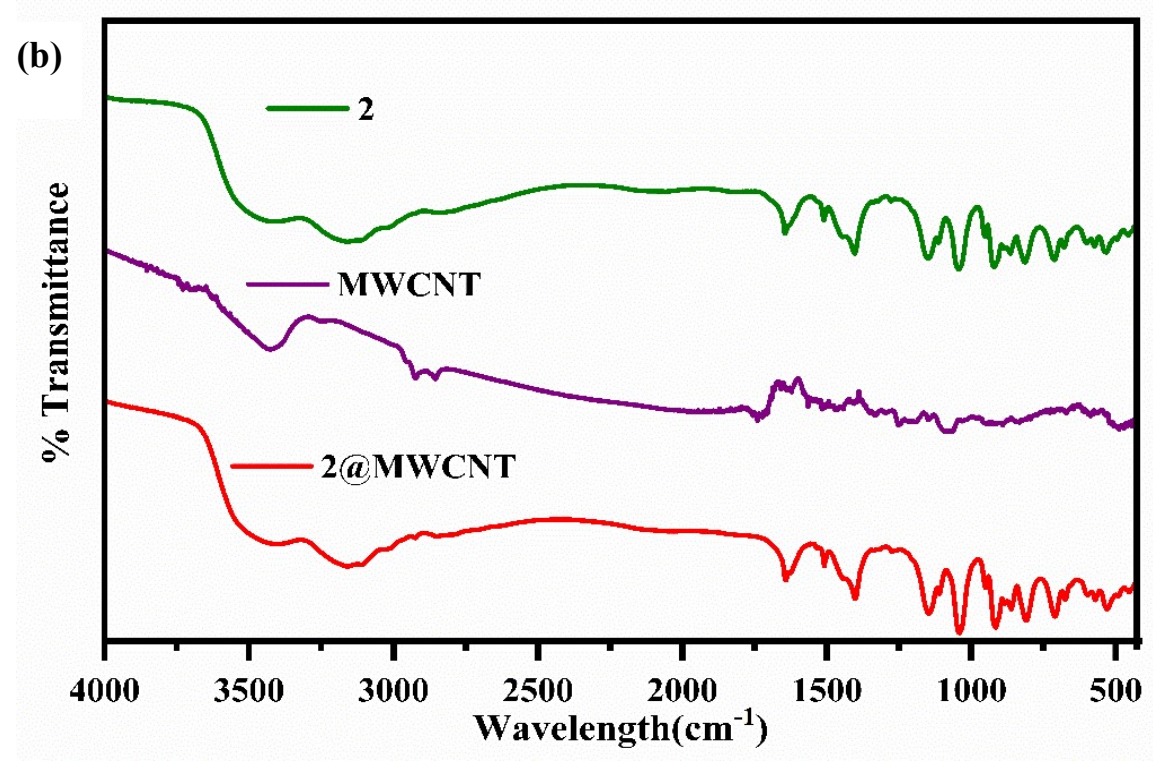

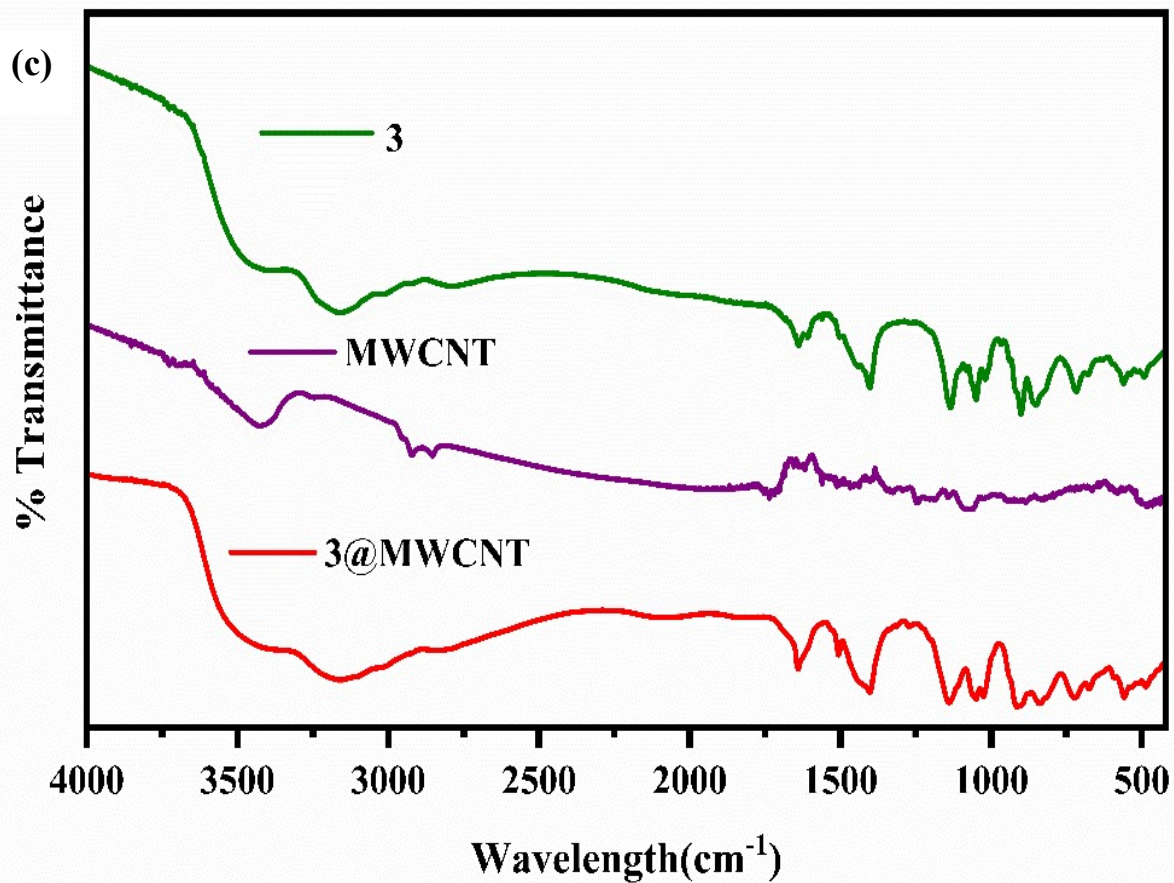

**Figure S24.** Comparative infrared spectra of (a) 1a, MWCNT@SS and 1-MWCNT@SS, (b) 2a, MWCNT@SS and 2-MWCNT@SS, (c) 3a, MWCNT@SS and 3-MWCNT@SS.

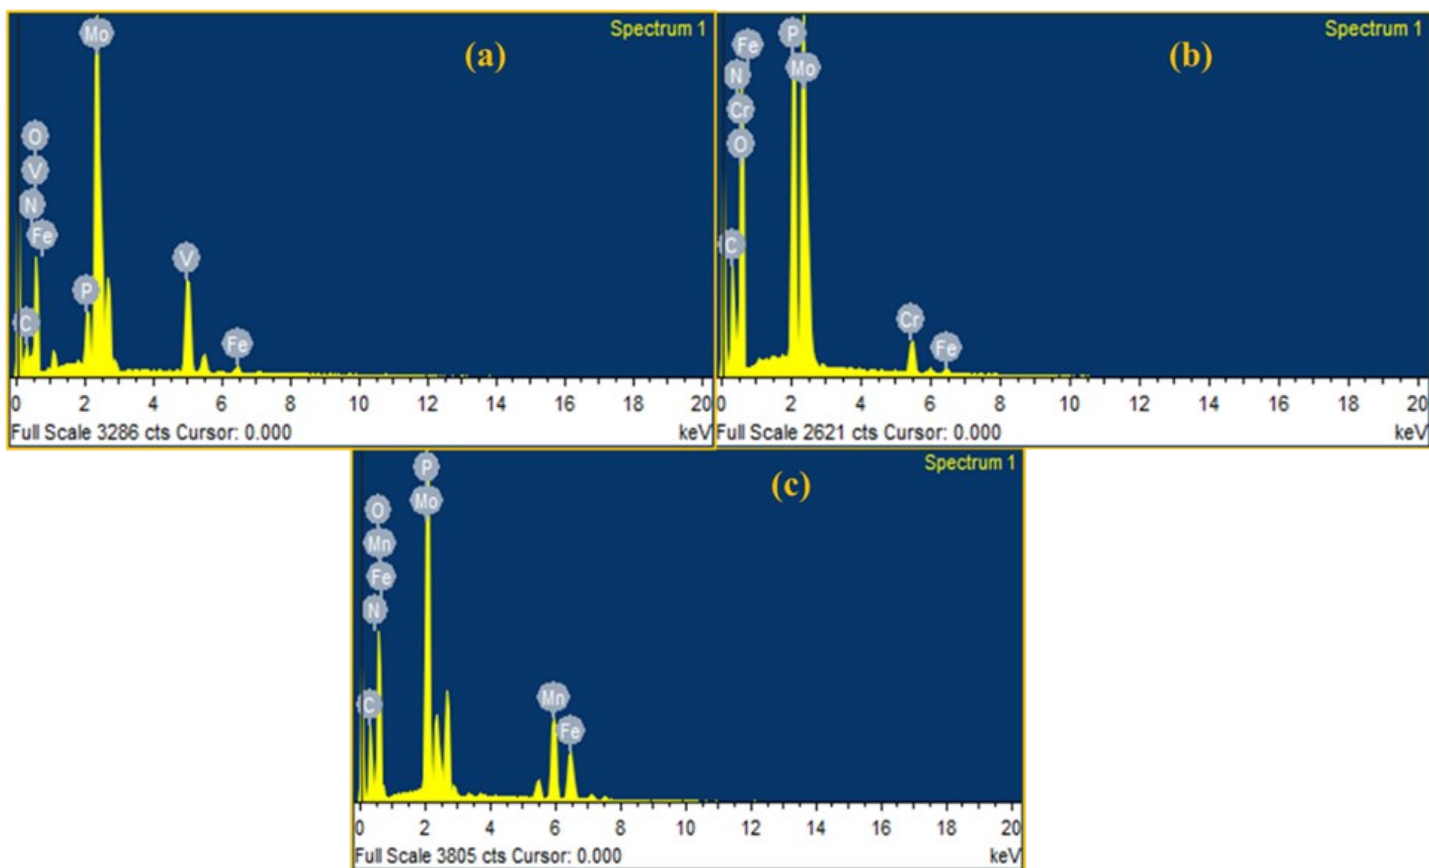

**Figure S25.** EDX spectra for **1-MWCNT@SS**, **(b) 2-MWCNT@SS**, and **(c) 3-MWCNT@SS**

**Table S10.** Elemental composition of **1-MWCNT@SS**, **2-MWCNT@SS**, and **3-MWCNT@SS**.

| 1-MWCNT@SS |          | 2-MWCNT@SS |          | 3-MWCNT@SS |          |
|------------|----------|------------|----------|------------|----------|
| Element    | Weight % | Element    | Weight % | Element    | Weight % |
| C          | 12.20    | C          | 22.04    | C          | 24.69    |
| N          | 8.54     | N          | 11.32    | N          | 7.80     |
| O          | 33.31    | O          | 38.65    | O          | 30.10    |
| P          | 1.56     | P          | 6.37     | P          | 12.17    |
| V          | 9.63     | Cr         | 1.97     | Mn         | 10.41    |
| Fe         | 1.17     | Fe         | 0.36     | Fe         | 6.30     |
| Mo         | 11.60    | Mo         | 19.29    | Mo         | 8.51     |

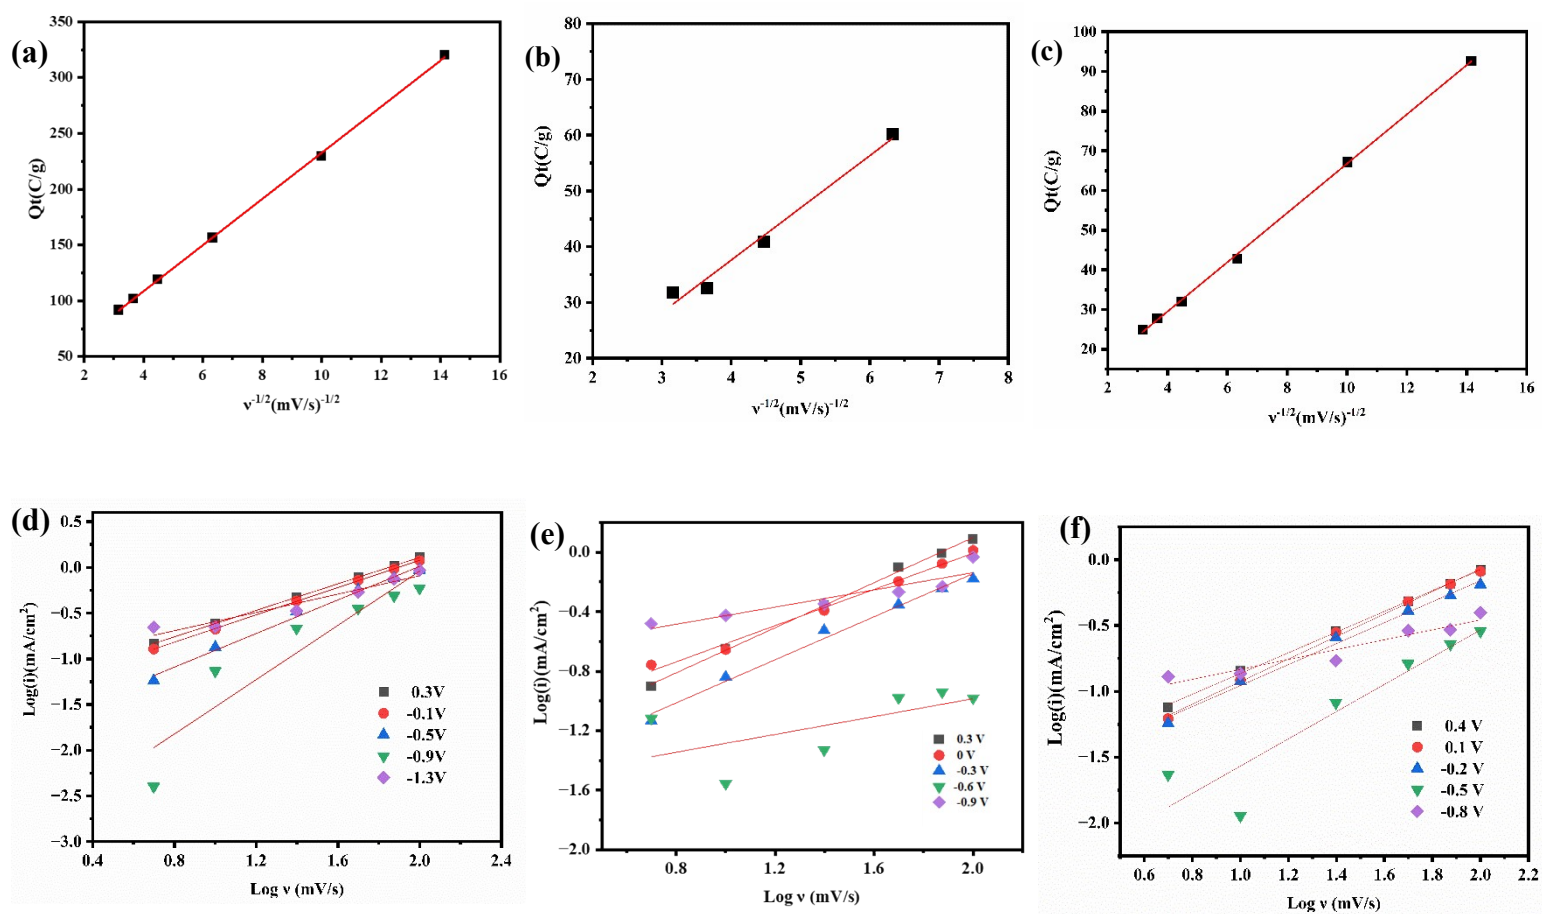

**Figure S26.** Electrochemical performance  $Q(\text{C/g})$  vs.  $v^{-1/2}(\text{mV/s})^{-1/2}$  for **(a) 1-MWCNT@SS**, **(b) 2-MWCNT@SS**, and **(c) 3-MWCNT@SS**. Plots of  $\text{log } i(\text{mA/cm}^2)$  vs.  $\text{log}(v)(\text{mV/s})$  for **(d) 1-MWCNT@SS**, **(e) 2-MWCNT@SS**, and **(f) 3-MWCNT@SS**.

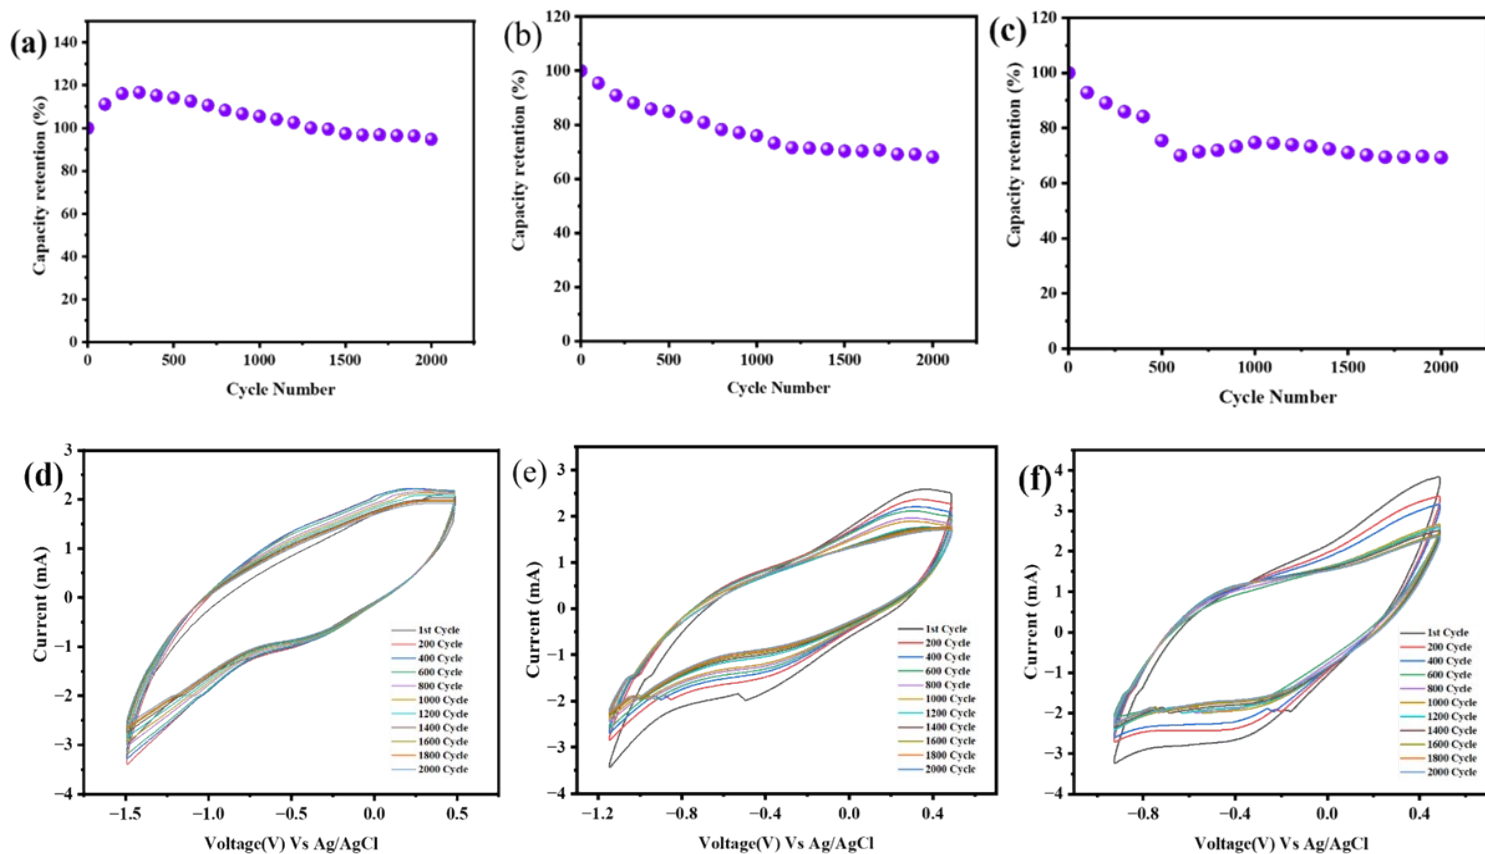

**Figure S27.** Capacity retention for the electrodes **(a) 1-MWCNT@SS**, **(b) 2-MWCNT@SS**, and **(c) 3-MWCNT@SS**. Cyclic stability test: Retention of stability for 2000 CV cycles for **(a) 1-MWCNT@SS**, **(b) 2-MWCNT@SS**, and **(c) 3-MWCNT@SS**.

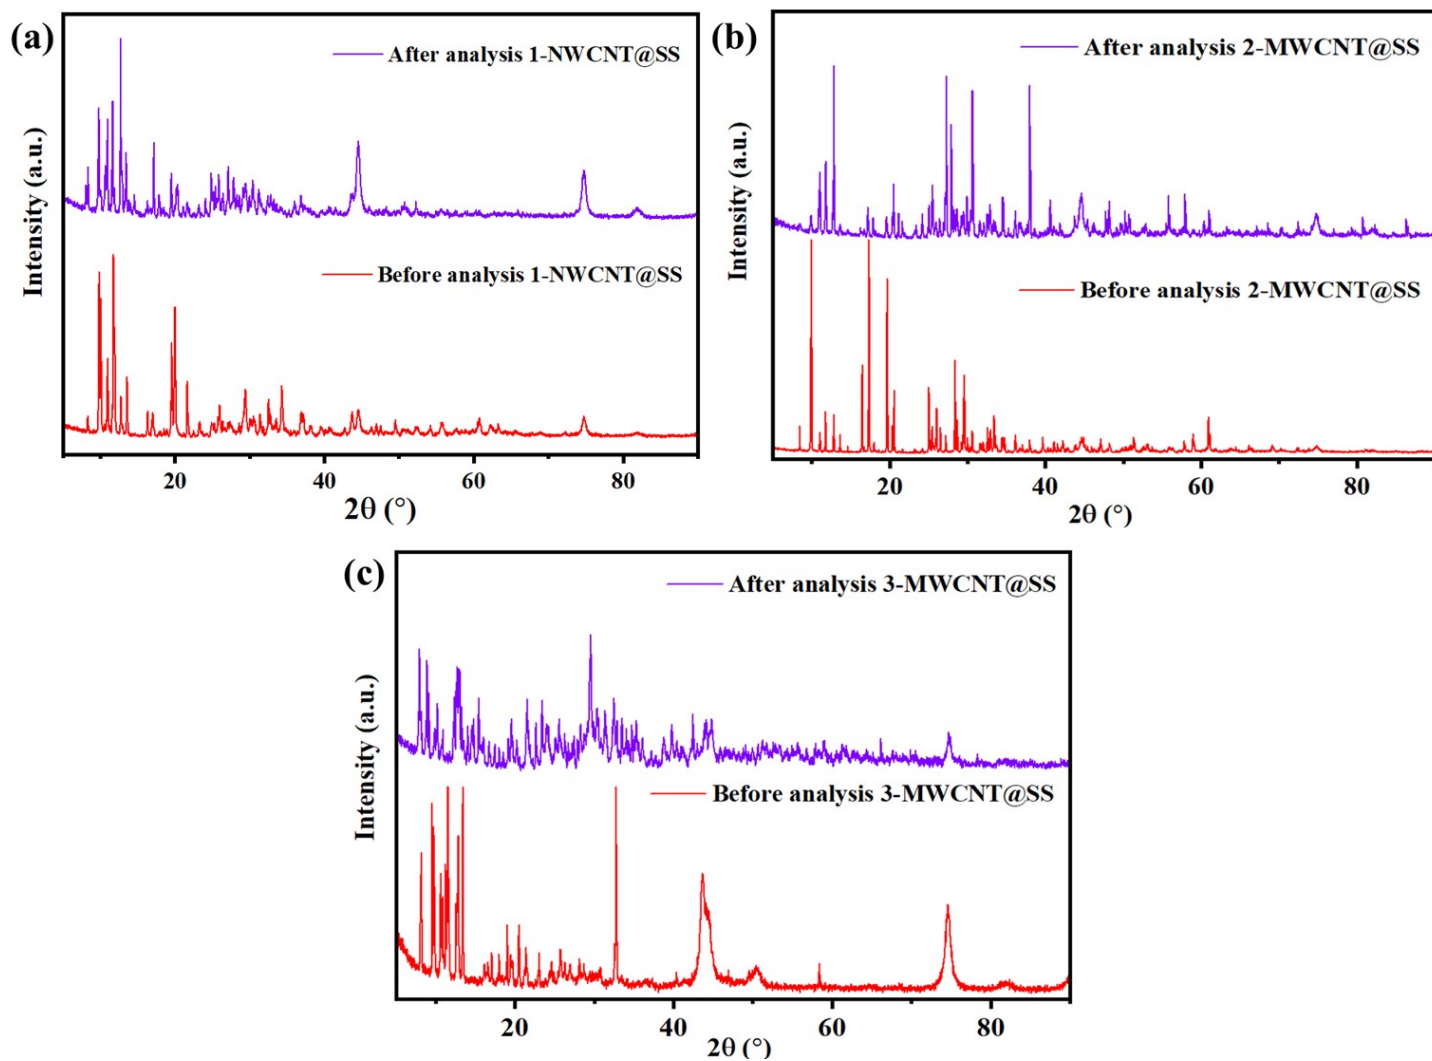

**Figure S28.** Comparative P-XRD patterns of 1-MWCNT@SS, 2-MWCNT@SS, and 3-MWCNT@SS before and after electrochemical analysis.

## Optimized Coordinates

Polyanion 1' in B3LYP-D3(BJ)/Def2svp gas phase

Energy = -5186.3590181 hf

|    |              |              |              |
|----|--------------|--------------|--------------|
| Mo | -2.938782000 | -2.237280000 | 0.177840000  |
| O  | -2.903055000 | -3.509786000 | -1.011274000 |
| O  | -2.993387000 | -3.127908000 | 1.660804000  |
| O  | -1.282554000 | -1.584200000 | 0.121015000  |
| O  | -5.032866000 | -2.014004000 | 0.054292000  |
| O  | -3.487028000 | -0.569173000 | -1.420669000 |
| O  | -3.587620000 | -0.254965000 | 1.238167000  |
| Mo | -5.536231000 | -0.273421000 | -0.158958000 |
| O  | -6.593066000 | -0.320731000 | -1.544792000 |
| O  | -6.687199000 | -0.016201000 | 1.124019000  |
| O  | -4.816243000 | 1.535758000  | -0.348396000 |
| V  | 0.011793000  | -0.011020000 | -0.042538000 |
| O  | 1.286091000  | 1.575117000  | -0.223568000 |
| O  | 1.256809000  | -0.984824000 | -1.355526000 |
| O  | -1.257551000 | 0.965849000  | 1.227052000  |
| O  | -1.164242000 | 0.668865000  | -1.517674000 |
| O  | 1.240250000  | -0.704438000 | 1.394581000  |
| P  | -2.711166000 | 0.793531000  | -1.731845000 |
| O  | -3.099431000 | 1.449631000  | -3.053425000 |
| C  | -3.417666000 | 1.817340000  | -0.316620000 |
| P  | -2.806947000 | 1.147211000  | 1.330536000  |
| O  | -3.273005000 | 2.041892000  | 2.466916000  |
| N  | -0.413222000 | 6.002675000  | 1.299058000  |
| C  | -0.033624000 | 4.798797000  | 0.811770000  |
| C  | -1.715499000 | 6.288920000  | 1.208779000  |
| C  | -3.307226000 | 3.338109000  | -0.570379000 |
| C  | -2.278797000 | 4.188423000  | 0.124059000  |
| H  | -3.190612000 | 3.450348000  | -1.667475000 |
| H  | -4.301779000 | 3.735707000  | -0.310455000 |
| C  | -2.666138000 | 5.437228000  | 0.650870000  |
| C  | -0.910738000 | 3.880062000  | 0.215922000  |
| H  | -3.723811000 | 5.729411000  | 0.626058000  |
| H  | -2.037865000 | 7.270415000  | 1.615020000  |
| H  | 1.029736000  | 4.530386000  | 0.895118000  |
| H  | -0.507830000 | 2.934547000  | -0.156620000 |



|    |              |              |              |
|----|--------------|--------------|--------------|
| Mo | 2.933145000  | 2.248405000  | -0.308807000 |
| Mo | 5.559585000  | 0.313488000  | -0.074821000 |
| O  | 2.935042000  | 3.181219000  | -1.769260000 |
| O  | 2.922935000  | 3.484949000  | 0.915485000  |
| O  | 3.559522000  | 0.286393000  | -1.444142000 |
| O  | 3.546534000  | 0.547296000  | 1.219436000  |
| O  | 5.027011000  | 2.048125000  | -0.261502000 |
| O  | 4.870069000  | -1.504727000 | 0.094181000  |
| O  | 6.655388000  | 0.361057000  | 1.278926000  |
| O  | 6.675493000  | 0.087874000  | -1.394938000 |
| P  | 2.807987000  | -1.127034000 | -1.504459000 |
| P  | 2.793280000  | -0.828248000 | 1.566127000  |
| C  | 3.474825000  | -1.813984000 | 0.115666000  |
| O  | 3.254573000  | -2.023655000 | -2.652159000 |
| O  | 3.239074000  | -1.470008000 | 2.871494000  |
| C  | 3.477415000  | -3.337686000 | 0.250745000  |
| H  | 4.107881000  | -3.549214000 | 1.133065000  |
| H  | 4.031931000  | -3.683024000 | -0.644427000 |
| C  | 2.248115000  | -4.205344000 | 0.342192000  |
| C  | 0.956754000  | -3.872335000 | -0.091630000 |
| C  | 2.421748000  | -5.525601000 | 0.813601000  |
| H  | 0.725640000  | -2.867904000 | -0.460656000 |
| C  | -0.051737000 | -4.851181000 | -0.070312000 |
| C  | 1.360978000  | -6.425418000 | 0.784091000  |
| H  | 3.405126000  | -5.840690000 | 1.188063000  |
| N  | 0.135543000  | -6.123686000 | 0.341304000  |
| H  | -1.057703000 | -4.576874000 | -0.416157000 |
| H  | 1.517527000  | -7.463726000 | 1.143430000  |

Polyanion 2' in B3LYP-D3(BJ)/Def2svp gas phase

Energy = -5286.7894563 hf

|    |              |             |              |
|----|--------------|-------------|--------------|
| Mo | -2.890874000 | 2.237788000 | -0.414701000 |
| O  | -2.842904000 | 3.592380000 | 0.674564000  |
| O  | -2.907240000 | 3.016923000 | -1.961160000 |
| O  | -1.241008000 | 1.556711000 | -0.288627000 |
| O  | -4.982105000 | 2.078519000 | -0.305333000 |
| O  | -3.490074000 | 0.724375000 | 1.298358000  |
| O  | -3.569102000 | 0.195833000 | -1.319173000 |
| Mo | -5.528348000 | 0.371346000 | 0.053296000  |

|    |              |              |              |
|----|--------------|--------------|--------------|
| O  | -6.597440000 | 0.561997000  | 1.416558000  |
| O  | -6.672513000 | 0.034309000  | -1.217253000 |
| O  | -4.854777000 | -1.430105000 | 0.398113000  |
| Cr | -0.000122000 | 0.000296000  | 0.000010000  |
| O  | 1.241019000  | -1.556478000 | 0.288885000  |
| O  | 1.267158000  | 1.065489000  | 1.189815000  |
| O  | -1.266948000 | -1.065418000 | -1.189513000 |
| O  | -1.191054000 | -0.545080000 | 1.537464000  |
| O  | 1.190907000  | 0.545544000  | -1.537167000 |
| P  | -2.738698000 | -0.621454000 | 1.736268000  |
| O  | -3.160931000 | -1.154108000 | 3.102762000  |
| C  | -3.462039000 | -1.743450000 | 0.405795000  |
| P  | -2.819399000 | -1.226786000 | -1.283389000 |
| O  | -3.294118000 | -2.203659000 | -2.346103000 |
| N  | -0.492775000 | -6.113471000 | -0.725187000 |
| C  | -0.113209000 | -4.859134000 | -0.388288000 |
| C  | -1.795257000 | -6.386215000 | -0.602833000 |
| C  | -3.394348000 | -3.238470000 | 0.786124000  |
| C  | -2.359064000 | -4.166289000 | 0.211422000  |
| H  | -3.322993000 | -3.258578000 | 1.892993000  |
| H  | -4.386237000 | -3.639619000 | 0.520510000  |
| C  | -2.746148000 | -5.471050000 | -0.157612000 |
| C  | -0.990175000 | -3.872710000 | 0.088534000  |
| H  | -3.804338000 | -5.757497000 | -0.099515000 |
| H  | -2.117589000 | -7.410315000 | -0.885366000 |
| H  | 0.950333000  | -4.604343000 | -0.503898000 |
| H  | -0.588250000 | -2.887884000 | 0.341908000  |
| Mo | 2.890691000  | -2.237681000 | 0.414774000  |
| Mo | 5.528357000  | -0.371519000 | -0.053957000 |
| O  | 2.907070000  | -3.017115000 | 1.961095000  |
| O  | 2.842586000  | -3.592061000 | -0.674791000 |
| O  | 3.569061000  | -0.196332000 | 1.319275000  |
| O  | 3.489815000  | -0.724311000 | -1.298830000 |
| O  | 4.981971000  | -2.078571000 | 0.304790000  |
| O  | 4.854861000  | 1.429978000  | -0.398182000 |
| O  | 6.597178000  | -0.562254000 | -1.417421000 |

|   |              |              |              |
|---|--------------|--------------|--------------|
| O | 6.672806000  | -0.034638000 | 1.216401000  |
| P | 2.819657000  | 1.226448000  | 1.283594000  |
| P | 2.738560000  | 0.621702000  | -1.736213000 |
| C | 3.462132000  | 1.743367000  | -0.405608000 |
| O | 3.294615000  | 2.203134000  | 2.346396000  |
| O | 3.160513000  | 1.154732000  | -3.102645000 |
| C | 3.394636000  | 3.238499000  | -0.785451000 |
| H | 3.323447000  | 3.259015000  | -1.892331000 |
| H | 4.386522000  | 3.639458000  | -0.519552000 |
| C | 2.359352000  | 4.166256000  | -0.210698000 |
| C | 2.746477000  | 5.470888000  | 0.158747000  |
| C | 0.990386000  | 3.872797000  | -0.088242000 |
| H | 3.804706000  | 5.757243000  | 0.101009000  |
| C | 1.795549000  | 6.386057000  | 0.603904000  |
| C | 0.113417000  | 4.859230000  | 0.388496000  |
| H | 0.588456000  | 2.888049000  | -0.341909000 |
| N | 0.493004000  | 6.113458000  | 0.725794000  |
| H | 2.117943000  | 7.410037000  | 0.886813000  |
| H | -0.950171000 | 4.604541000  | 0.503743000  |

Polyanion 3' in B3LYP-D3(BJ)/Def2svp gas phase

Energy = -5393.276736 hf

|    |              |              |              |
|----|--------------|--------------|--------------|
| Mo | 2.863793000  | 2.229050000  | 0.418537000  |
| O  | 2.749660000  | 3.589895000  | -0.653594000 |
| O  | 2.877605000  | 2.991107000  | 1.970729000  |
| O  | 1.219829000  | 1.502044000  | 0.306756000  |
| O  | 4.949876000  | 2.162755000  | 0.239100000  |
| O  | 3.419253000  | 0.749290000  | -1.316020000 |
| O  | 3.684008000  | 0.238244000  | 1.292348000  |
| Mo | 5.553802000  | 0.468330000  | -0.102875000 |
| O  | 6.555037000  | 0.691581000  | -1.513570000 |
| O  | 6.763138000  | 0.190906000  | 1.118106000  |
| O  | 4.931371000  | -1.347427000 | -0.465627000 |
| Mn | -0.000131000 | -0.000059000 | -0.000142000 |

|    |              |              |              |
|----|--------------|--------------|--------------|
| O  | -1.219948000 | -1.502441000 | -0.306863000 |
| O  | -1.454450000 | 1.149944000  | -1.361170000 |
| O  | 1.455068000  | -1.150252000 | 1.362001000  |
| O  | 1.167210000  | -0.613368000 | -1.421481000 |
| O  | -1.167110000 | 0.612557000  | 1.421886000  |
| P  | 2.722355000  | -0.634480000 | -1.684823000 |
| O  | 3.068535000  | -1.176762000 | -3.066682000 |
| C  | 3.554053000  | -1.717745000 | -0.386112000 |
| P  | 2.994478000  | -1.232855000 | 1.343335000  |
| O  | 3.654868000  | -2.157930000 | 2.358343000  |
| N  | 0.587367000  | -6.091946000 | 0.674207000  |
| C  | 0.222176000  | -4.828897000 | 0.356051000  |
| C  | 1.888564000  | -6.375015000 | 0.561503000  |
| C  | 3.534173000  | -3.215609000 | -0.742918000 |
| C  | 2.480714000  | -4.145875000 | -0.205437000 |
| H  | 3.515582000  | -3.256553000 | -1.851519000 |
| H  | 4.515446000  | -3.596897000 | -0.415098000 |
| C  | 2.852408000  | -5.460302000 | 0.144099000  |
| C  | 1.113505000  | -3.841109000 | -0.091634000 |
| H  | 3.908893000  | -5.754561000 | 0.093029000  |
| H  | 2.198081000  | -7.406941000 | 0.829194000  |
| H  | -0.840695000 | -4.569095000 | 0.464523000  |
| H  | 0.728669000  | -2.847502000 | -0.333582000 |
| Mo | -2.864050000 | -2.229086000 | -0.418653000 |
| Mo | -5.553938000 | -0.468051000 | 0.102878000  |
| O  | -2.878025000 | -2.991093000 | -1.970870000 |
| O  | -2.750273000 | -3.590006000 | 0.653397000  |
| O  | -3.683652000 | -0.238136000 | -1.292395000 |
| O  | -3.419326000 | -0.749544000 | 1.315999000  |
| O  | -4.950359000 | -2.162496000 | -0.239209000 |

|   |              |              |              |
|---|--------------|--------------|--------------|
| O | -4.930988000 | 1.347437000  | 0.465824000  |
| O | -6.555476000 | -0.691246000 | 1.513379000  |
| O | -6.763017000 | -0.190135000 | -1.118268000 |
| P | -2.993912000 | 1.232838000  | -1.342954000 |
| P | -2.722201000 | 0.634087000  | 1.685078000  |
| C | -3.553645000 | 1.717582000  | 0.386461000  |
| O | -3.653744000 | 2.158156000  | -2.358072000 |
| O | -3.068481000 | 1.176277000  | 3.066941000  |
| C | -3.533523000 | 3.215448000  | 0.743462000  |
| H | -3.514215000 | 3.256239000  | 1.852061000  |
| H | -4.515021000 | 3.596736000  | 0.416347000  |
| C | -2.480449000 | 4.145837000  | 0.205450000  |
| C | -2.852599000 | 5.460019000  | -0.144500000 |
| C | -1.113162000 | 3.841457000  | 0.091600000  |
| H | -3.909189000 | 5.753912000  | -0.093527000 |
| C | -1.889076000 | 6.374923000  | -0.562219000 |
| C | -0.222180000 | 4.829384000  | -0.356488000 |
| H | -0.727959000 | 2.848037000  | 0.333738000  |
| N | -0.587798000 | 6.092251000  | -0.674924000 |
| H | -2.198931000 | 7.406669000  | -0.830168000 |
| H | 0.840726000  | 4.569807000  | -0.465024000 |

Polyanion 1<sup>-</sup> in B3LYP-D3(BJ)/Def2svp gas phase

Energy = -5185.8669403 hf

|    |             |              |              |
|----|-------------|--------------|--------------|
| Mo | 2.266637000 | -2.959074000 | -0.281263000 |
| O  | 1.912686000 | -4.203459000 | 0.879824000  |
| O  | 2.119570000 | -3.812462000 | -1.789097000 |
| O  | 0.857458000 | -1.879384000 | -0.232176000 |
| O  | 4.369150000 | -3.312890000 | -0.162461000 |
| O  | 3.242534000 | -1.572317000 | 1.354187000  |
| O  | 3.447865000 | -1.187086000 | -1.270797000 |

|    |              |              |              |
|----|--------------|--------------|--------------|
| Mo | 5.311653000  | -1.783399000 | 0.137767000  |
| O  | 6.296353000  | -2.183006000 | 1.523821000  |
| O  | 6.508576000  | -1.804610000 | -1.131989000 |
| O  | 5.113513000  | 0.154317000  | 0.398720000  |
| V  | -0.000065000 | -0.000080000 | 0.000052000  |
| O  | -0.857509000 | 1.879122000  | 0.232419000  |
| O  | -1.540558000 | -0.638602000 | 1.196064000  |
| O  | 1.540319000  | 0.638106000  | -1.196237000 |
| O  | 1.314371000  | 0.218541000  | 1.513400000  |
| O  | -1.314470000 | -0.218449000 | -1.513480000 |
| P  | 2.837232000  | -0.070076000 | 1.736228000  |
| O  | 3.353476000  | 0.369788000  | 3.103567000  |
| C  | 3.851639000  | 0.801329000  | 0.375726000  |
| P  | 3.074920000  | 0.373611000  | -1.290450000 |
| O  | 3.761166000  | 1.122912000  | -2.436910000 |
| N  | 7.358730000  | 4.816469000  | -0.720968000 |
| C  | 6.933106000  | 4.776772000  | 0.576980000  |
| C  | 6.665261000  | 3.938188000  | -1.524834000 |
| C  | 3.996190000  | 2.299534000  | 0.729498000  |
| C  | 5.182196000  | 3.090206000  | 0.214790000  |
| H  | 3.050645000  | 2.775911000  | 0.403907000  |
| H  | 4.012633000  | 2.354763000  | 1.833091000  |
| C  | 5.630348000  | 3.095463000  | -1.142791000 |
| C  | 5.905855000  | 3.966891000  | 1.061583000  |
| H  | 5.114922000  | 2.415544000  | -1.845298000 |
| H  | 6.992346000  | 3.921506000  | -2.581736000 |
| H  | 7.469339000  | 5.444871000  | 1.285093000  |
| H  | 5.645247000  | 4.008903000  | 2.127976000  |
| Mo | -2.266517000 | 2.959060000  | 0.281646000  |
| Mo | -5.311376000 | 1.783551000  | -0.137683000 |

|   |              |              |              |
|---|--------------|--------------|--------------|
| O | -2.119406000 | 3.812117000  | 1.789659000  |
| O | -1.912163000 | 4.203580000  | -0.879170000 |
| O | -3.447911000 | 1.186818000  | 1.270861000  |
| O | -3.242544000 | 1.572501000  | -1.354035000 |
| O | -4.368726000 | 3.313002000  | 0.162789000  |
| O | -5.113582000 | -0.154032000 | -0.398904000 |
| O | -6.296034000 | 2.183575000  | -1.523654000 |
| O | -6.508293000 | 1.804755000  | 1.132075000  |
| P | -3.075127000 | -0.373863000 | 1.290339000  |
| P | -2.837294000 | 0.070282000  | -1.736279000 |
| C | -3.851830000 | -0.801315000 | -0.375906000 |
| O | -3.761472000 | -1.123243000 | 2.436704000  |
| O | -3.353568000 | -0.369296000 | -3.103710000 |
| C | -3.996667000 | -2.299390000 | -0.730036000 |
| H | -3.051092000 | -2.775909000 | -0.404724000 |
| H | -4.013281000 | -2.354312000 | -1.833645000 |
| C | -5.182611000 | -3.090163000 | -0.215333000 |
| C | -5.630545000 | -3.095830000 | 1.142294000  |
| C | -5.906439000 | -3.966650000 | -1.062268000 |
| H | -5.115224000 | -2.415879000 | 1.844850000  |
| C | -6.665299000 | -3.938739000 | 1.524346000  |
| C | -6.933509000 | -4.776735000 | -0.577660000 |
| H | -5.646072000 | -4.008307000 | -2.128732000 |
| N | -7.358872000 | -4.816924000 | 0.720311000  |
| H | -6.992260000 | -3.922366000 | 2.581282000  |
| H | -7.469885000 | -5.444582000 | -1.285936000 |

Polyanion 2<sup>-</sup> in B3LYP-D3(BJ)/Def2svp gas phase

Energy = -5286.294311 hf

|    |             |             |              |
|----|-------------|-------------|--------------|
| Mo | 2.211079000 | 2.943613000 | 0.280093000  |
| O  | 1.841539000 | 4.184873000 | -0.877436000 |

|    |              |              |              |
|----|--------------|--------------|--------------|
| O  | 2.044354000  | 3.790375000  | 1.788306000  |
| O  | 0.811941000  | 1.841525000  | 0.223319000  |
| O  | 4.301438000  | 3.331646000  | 0.174422000  |
| O  | 3.212813000  | 1.582812000  | -1.346079000 |
| O  | 3.405538000  | 1.190945000  | 1.272012000  |
| Mo | 5.264436000  | 1.812179000  | -0.130685000 |
| O  | 6.250001000  | 2.230224000  | -1.510696000 |
| O  | 6.456109000  | 1.845124000  | 1.144190000  |
| O  | 5.093102000  | -0.126590000 | -0.393926000 |
| Cr | -0.000218000 | 0.000266000  | 0.000045000  |
| O  | -0.811718000 | -1.840925000 | -0.223438000 |
| O  | -1.512996000 | 0.645578000  | -1.191089000 |
| O  | 1.512349000  | -0.644896000 | 1.191380000  |
| O  | 1.296686000  | -0.216807000 | -1.527928000 |
| O  | -1.297146000 | 0.217784000  | 1.527771000  |
| P  | 2.813971000  | 0.077447000  | -1.737747000 |
| O  | 3.343579000  | -0.349304000 | -3.104819000 |
| C  | 3.837190000  | -0.786221000 | -0.379695000 |
| P  | 3.045025000  | -0.373390000 | 1.282498000  |
| O  | 3.732038000  | -1.122597000 | 2.428713000  |
| N  | 7.372797000  | -4.776267000 | 0.721617000  |
| C  | 6.665047000  | -3.909239000 | 1.525345000  |
| C  | 6.956805000  | -4.732318000 | -0.579408000 |
| C  | 3.998127000  | -2.281336000 | -0.739069000 |
| C  | 5.187302000  | -3.064310000 | -0.220474000 |
| H  | 3.054185000  | -2.766795000 | -0.422153000 |
| H  | 4.022065000  | -2.330687000 | -1.842864000 |
| C  | 5.925742000  | -3.928804000 | -1.066884000 |
| C  | 5.625268000  | -3.073800000 | 1.140627000  |
| H  | 5.673742000  | -3.966478000 | -2.135548000 |



|    |              |              |              |
|----|--------------|--------------|--------------|
| H  | 7.504698000  | -5.390980000 | -1.287557000 |
| H  | 6.984062000  | -3.896027000 | 2.584827000  |
| H  | 5.098084000  | -2.402216000 | 1.842683000  |
| Mo | -2.210504000 | -2.943580000 | -0.279940000 |
| Mo | -5.263787000 | -1.812537000 | 0.130751000  |
| O  | -2.043622000 | -3.790209000 | -1.788207000 |
| O  | -1.840346000 | -4.184652000 | 0.877570000  |
| O  | -3.405676000 | -1.190869000 | -1.271974000 |
| O  | -3.212623000 | -1.582655000 | 1.346121000  |
| O  | -4.300404000 | -3.331997000 | -0.174062000 |
| O  | -5.093438000 | 0.126165000  | 0.394021000  |
| O  | -6.249437000 | -2.230882000 | 1.510669000  |
| O  | -6.455251000 | -1.846029000 | -1.144359000 |
| P  | -3.045572000 | 0.373563000  | -1.282449000 |
| P  | -2.814310000 | -0.077213000 | 1.737754000  |
| C  | -3.837813000 | 0.786291000  | 0.379759000  |
| O  | -3.732623000 | 1.122437000  | -2.428843000 |
| O  | -3.343869000 | 0.349280000  | 3.104924000  |
| C  | -3.999258000 | 2.281280000  | 0.739211000  |
| H  | -3.055249000 | 2.766904000  | 0.422711000  |
| H  | -4.023571000 | 2.330500000  | 1.843007000  |
| C  | -5.188349000 | 3.064195000  | 0.220302000  |
| C  | -5.926857000 | 3.928924000  | 1.066513000  |
| C  | -5.626187000 | 3.073557000  | -1.140829000 |
| H  | -5.675012000 | 3.966739000  | 2.135211000  |
| C  | -6.957749000 | 4.732456000  | 0.578781000  |
| C  | -6.665826000 | 3.909034000  | -1.525834000 |
| H  | -5.099083000 | 2.401771000  | -1.842732000 |
| N  | -7.373619000 | 4.776322000  | -0.722297000 |
| H  | -7.505656000 | 5.391263000  | 1.286808000  |

H -6.984747000 3.895651000 -2.585339000

Polyanion 3<sup>-</sup> in B3LYP-D3(BJ)/Def2svp gas phase

Energy = -5392.7541922 hf

|    |              |              |              |
|----|--------------|--------------|--------------|
| Mo | 3.200713000  | 2.222509000  | 0.397521000  |
| O  | 3.235717000  | 3.576691000  | -0.708902000 |
| O  | 3.348221000  | 3.025423000  | 1.940587000  |
| O  | 1.527664000  | 1.699548000  | 0.333169000  |
| O  | 5.390501000  | 1.999546000  | 0.228221000  |
| O  | 3.735205000  | 0.680374000  | -1.301807000 |
| O  | 3.883756000  | 0.201756000  | 1.317068000  |
| Mo | 5.853122000  | 0.286957000  | -0.086931000 |
| O  | 6.913047000  | 0.400905000  | -1.481029000 |
| O  | 7.027802000  | -0.068554000 | 1.166269000  |
| O  | 5.105597000  | -1.496403000 | -0.392590000 |
| Mn | 0.000089000  | 0.000117000  | -0.000190000 |
| O  | -1.527646000 | -1.699582000 | -0.333783000 |
| O  | -1.572719000 | 1.084377000  | -1.323391000 |
| O  | 1.572623000  | -1.084022000 | 1.323457000  |
| O  | 1.434770000  | -0.609881000 | -1.554880000 |
| O  | -1.434607000 | 0.609622000  | 1.554640000  |
| P  | 2.974354000  | -0.677289000 | -1.715841000 |
| O  | 3.456477000  | -1.242355000 | -3.061904000 |
| C  | 3.705377000  | -1.771855000 | -0.358590000 |
| P  | 3.110602000  | -1.224919000 | 1.343462000  |
| O  | 3.688785000  | -2.179425000 | 2.392436000  |
| N  | 0.373911000  | -5.873997000 | 0.664695000  |
| C  | 0.120499000  | -4.600879000 | 0.276798000  |
| C  | 1.653266000  | -6.256744000 | 0.636217000  |
| C  | 3.600175000  | -3.275815000 | -0.683881000 |
| C  | 2.455741000  | -4.112452000 | -0.181260000 |
| H  | 3.633171000  | -3.332174000 | -1.793176000 |
| H  | 4.534437000  | -3.721033000 | -0.299074000 |
| C  | 2.706871000  | -5.434242000 | 0.242034000  |
| C  | 1.108560000  | -3.705922000 | -0.163840000 |
| H  | 3.740761000  | -5.806038000 | 0.267923000  |
| H  | 1.869186000  | -7.299569000 | 0.959832000  |

|    |             |             |             |
|----|-------------|-------------|-------------|
| H  | -0.92460000 | -4.26476700 | 0.32294400  |
| H  | 0.82721300  | -2.70246900 | -0.49147800 |
| Mo | -3.20071400 | -2.22244500 | -0.39798300 |
| Mo | -5.85312700 | -0.28703000 | 0.08728800  |
| O  | -3.34842100 | -3.02505100 | -1.94120200 |
| O  | -3.23564500 | -3.57685500 | 0.70817500  |
| O  | -3.88372900 | -0.20160600 | -1.31716800 |
| O  | -3.73503500 | -0.68061200 | 1.30161200  |
| O  | -5.39051600 | -1.99952900 | -0.22831100 |
| O  | -5.10560300 | 1.49631700  | 0.39297400  |
| O  | -6.91290300 | -0.40126100 | 1.48146600  |
| O  | -7.02795300 | 0.06869800  | -1.16572300 |
| P  | -3.11071800 | 1.22512100  | -1.34335200 |
| P  | -2.97416200 | 0.67702400  | 1.71579200  |
| C  | -3.70537600 | 1.77180500  | 0.35882900  |
| O  | -3.68904600 | 2.17974100  | -2.39214200 |
| O  | -3.45610800 | 1.24186800  | 3.06201000  |
| C  | -3.60015400 | 3.27573400  | 0.68427300  |
| H  | -3.63301100 | 3.33198400  | 1.79357600  |
| H  | -4.53447200 | 3.72097000  | 0.29962800  |
| C  | -2.45580000 | 4.11244000  | 0.18157300  |
| C  | -2.70701400 | 5.43423100  | -0.24166700 |
| C  | -1.10860100 | 3.70597500  | 0.16404200  |
| H  | -3.74092100 | 5.80599000  | -0.26744700 |
| C  | -1.65347900 | 6.25677300  | -0.63595000 |
| C  | -0.12060900 | 4.60096700  | -0.27667900 |
| H  | -0.82717100 | 2.70254200  | 0.49165400  |
| N  | -0.37410900 | 5.87407100  | -0.66456700 |
| H  | -1.86946500 | 7.29959900  | -0.95951600 |
| H  | 0.92450200  | 4.26488700  | -0.32293800 |

Polyanion 1<sup>+</sup> in B3LYP-D3(BJ)/Def2svp gas phase

Energy = -5186.780418 hf

|    |            |            |             |
|----|------------|------------|-------------|
| Mo | 2.98874100 | 2.01443600 | -0.00079600 |
| O  | 2.97976400 | 3.07632400 | -1.34805900 |
| O  | 2.98008100 | 3.07660400 | 1.34608300  |

|    |              |              |              |
|----|--------------|--------------|--------------|
| O  | 1.255661000  | 1.350504000  | -0.000533000 |
| O  | 4.994073000  | 1.693737000  | -0.001000000 |
| O  | 3.465352000  | 0.142249000  | -1.358254000 |
| O  | 3.465615000  | 0.143236000  | 1.357734000  |
| Mo | 5.444645000  | -0.102051000 | -0.000450000 |
| O  | 6.530570000  | -0.245201000 | -1.341883000 |
| O  | 6.531066000  | -0.244176000 | 1.340695000  |
| O  | 4.642989000  | -1.878346000 | 0.000439000  |
| V  | -0.000014000 | -0.000080000 | 0.000054000  |
| O  | -1.255843000 | -1.350502000 | 0.000570000  |
| O  | -1.083048000 | 0.917075000  | -1.382108000 |
| O  | 1.083378000  | -0.917300000 | 1.381991000  |
| O  | 1.083205000  | -0.918464000 | -1.381160000 |
| O  | -1.083523000 | 0.918360000  | 1.381237000  |
| P  | 2.615107000  | -1.199595000 | -1.540770000 |
| O  | 2.961094000  | -2.034507000 | -2.764898000 |
| C  | 3.231491000  | -2.063367000 | 0.000639000  |
| P  | 2.615334000  | -1.198388000 | 1.541437000  |
| O  | 2.961445000  | -2.032414000 | 2.766147000  |
| N  | -0.931850000 | -5.352981000 | 0.001763000  |
| C  | -0.338415000 | -4.970431000 | -1.135124000 |
| C  | -0.338882000 | -4.968613000 | 1.138302000  |
| C  | 3.003770000  | -3.572611000 | 0.001105000  |
| C  | 1.580681000  | -4.060099000 | 0.001260000  |
| H  | 3.517192000  | -3.952380000 | -0.898044000 |
| H  | 3.517208000  | -3.951900000 | 0.900473000  |
| C  | 0.897369000  | -4.324020000 | 1.196475000  |
| C  | 0.897806000  | -4.325829000 | -1.193793000 |
| H  | 1.343447000  | -3.998195000 | 2.140821000  |
| H  | -0.889092000 | -5.181029000 | 2.064409000  |

|    |              |              |              |
|----|--------------|--------------|--------------|
| H  | -0.888166000 | -5.184443000 | -2.061150000 |
| H  | 1.344166000  | -4.001258000 | -2.138432000 |
| Mo | -2.988904000 | -2.014468000 | 0.000663000  |
| Mo | -5.444628000 | 0.102225000  | -0.000772000 |
| O  | -2.979930000 | -3.077048000 | -1.345961000 |
| O  | -2.980354000 | -3.075933000 | 1.348175000  |
| O  | -3.465367000 | -0.143223000 | -1.358407000 |
| O  | -3.465740000 | -0.142205000 | 1.357512000  |
| O  | -4.994221000 | -1.693602000 | -0.000018000 |
| O  | -4.642858000 | 1.878402000  | -0.001466000 |
| O  | -6.530951000 | 0.245458000  | 1.340339000  |
| O  | -6.530672000 | 0.244388000  | -1.342231000 |
| P  | -2.614958000 | 1.198296000  | -1.541850000 |
| P  | -2.615465000 | 1.199602000  | 1.540378000  |

Polyanion I' in B3LYP-D3(BJ)/Def2svp water medium

Energy = -5188.6682985 hf

|    |              |              |              |
|----|--------------|--------------|--------------|
| Mo | -2.405218000 | -2.967018000 | 0.130878000  |
| O  | -2.229265000 | -4.185919000 | -1.094654000 |
| O  | -2.318898000 | -3.856890000 | 1.624189000  |
| O  | -0.841535000 | -2.060005000 | 0.114886000  |
| O  | -4.521377000 | -3.120619000 | 0.095091000  |
| O  | -3.163438000 | -1.483754000 | -1.397583000 |
| O  | -3.259988000 | -1.221024000 | 1.459939000  |
| Mo | -5.410482000 | -1.539900000 | -0.183542000 |
| O  | -6.334668000 | -1.802548000 | -1.619868000 |
| O  | -6.608713000 | -1.531908000 | 1.064087000  |
| O  | -4.924561000 | 0.371266000  | -0.302511000 |
| V  | 0.000417000  | -0.216284000 | 0.036423000  |
| O  | 0.688917000  | 1.682829000  | -0.100099000 |
| O  | 1.369932000  | -0.914294000 | -1.241830000 |

|    |              |              |              |
|----|--------------|--------------|--------------|
| O  | -1.335742000 | 0.520929000  | 1.331736000  |
| O  | -1.197025000 | 0.226458000  | -1.518855000 |
| O  | 1.248514000  | -0.640341000 | 1.531381000  |
| P  | -2.743069000 | 0.027382000  | -1.643163000 |
| O  | -3.310499000 | 0.568035000  | -2.948957000 |
| C  | -3.592575000 | 0.868162000  | -0.211436000 |
| P  | -2.889898000 | 0.307085000  | 1.428491000  |
| O  | -3.495158000 | 1.073581000  | 2.600237000  |
| N  | -7.123339000 | 4.630182000  | 0.622008000  |
| C  | -6.482670000 | 4.805890000  | -0.540184000 |
| C  | -6.602026000 | 3.722507000  | 1.461697000  |
| C  | -3.538946000 | 2.400979000  | -0.409643000 |
| C  | -4.788417000 | 3.156935000  | -0.026834000 |
| H  | -2.673653000 | 2.786713000  | 0.155580000  |
| H  | -3.341333000 | 2.614790000  | -1.469601000 |
| C  | -5.456497000 | 2.975734000  | 1.193999000  |
| C  | -5.334518000 | 4.101261000  | -0.906335000 |
| H  | -5.070237000 | 2.257849000  | 1.918592000  |
| H  | -7.128585000 | 3.576762000  | 2.411656000  |
| H  | -6.904307000 | 5.547181000  | -1.228149000 |
| H  | -4.868986000 | 4.289831000  | -1.876735000 |
| Mo | 2.112662000  | 2.758922000  | -0.226159000 |
| Mo | 5.372602000  | 1.711997000  | 0.063986000  |
| O  | 1.803889000  | 3.658507000  | -1.680048000 |
| O  | 1.898361000  | 3.973890000  | 1.003405000  |
| O  | 2.981907000  | 1.094264000  | -1.560939000 |
| O  | 2.861619000  | 1.402429000  | 1.572641000  |
| O  | 4.198929000  | 3.080772000  | -0.211751000 |
| O  | 4.969598000  | -0.184417000 | 0.271139000  |
| O  | 6.263653000  | 2.099411000  | 1.495365000  |

|   |             |              |              |
|---|-------------|--------------|--------------|
| O | 6.555093000 | 1.810760000  | -1.189485000 |
| P | 2.872185000 | -0.460223000 | -1.400279000 |
| P | 2.743664000 | -0.151958000 | 1.698379000  |
| C | 3.700040000 | -0.832718000 | 0.236004000  |
| O | 3.564607000 | -1.209858000 | -2.536410000 |
| O | 3.375411000 | -0.696203000 | 2.978455000  |
| C | 3.864320000 | -2.369743000 | 0.425281000  |
| H | 3.134794000 | -2.881959000 | -0.221892000 |
| H | 3.612752000 | -2.632192000 | 1.461100000  |
| C | 5.250880000 | -2.891263000 | 0.146414000  |
| C | 5.888483000 | -2.731911000 | -1.094064000 |
| C | 5.971264000 | -3.562256000 | 1.142180000  |
| H | 5.372257000 | -2.207033000 | -1.899092000 |
| C | 7.174963000 | -3.236219000 | -1.268611000 |

Polyanion **2'** in B3LYP-D3(BJ)/Def2svp water medium

Energy = -5289.1265027 hf

|    |              |              |              |
|----|--------------|--------------|--------------|
| Mo | 3.030040000  | -1.959278000 | -0.116513000 |
| O  | 3.304242000  | -2.961860000 | 1.276976000  |
| O  | 3.116246000  | -3.100792000 | -1.418638000 |
| O  | 1.283912000  | -1.524957000 | 0.022362000  |
| O  | 5.123282000  | -1.567853000 | -0.176706000 |
| O  | 3.419430000  | -0.200030000 | 1.469323000  |
| O  | 3.150407000  | -0.278728000 | -1.593637000 |
| Mo | 5.614333000  | 0.181068000  | -0.064426000 |
| O  | 6.770779000  | 0.318445000  | 1.211328000  |
| O  | 6.561439000  | 0.450803000  | -1.486473000 |
| O  | 4.583584000  | 1.833760000  | -0.076903000 |
| Cr | -0.017353000 | -0.022727000 | 0.081461000  |
| O  | -1.297513000 | 1.473908000  | 0.178004000  |
| O  | -1.013038000 | -1.003259000 | 1.493577000  |

|    |              |              |              |
|----|--------------|--------------|--------------|
| O  | 0.919458000  | 0.992193000  | -1.347774000 |
| O  | 1.067836000  | 0.901953000  | 1.477667000  |
| O  | -1.054143000 | -0.954681000 | -1.339835000 |
| P  | 2.619072000  | 1.154560000  | 1.531241000  |
| O  | 3.019212000  | 2.031681000  | 2.716756000  |
| C  | 3.165240000  | 1.981232000  | -0.049331000 |
| P  | 2.466406000  | 1.140215000  | -1.567332000 |
| O  | 2.815974000  | 1.973602000  | -2.797674000 |
| N  | -1.010643000 | 5.277176000  | 0.055478000  |
| C  | -0.353671000 | 4.956386000  | 1.178111000  |
| C  | -0.445771000 | 4.911064000  | -1.102535000 |
| C  | 2.929480000  | 3.500639000  | -0.062669000 |
| C  | 1.515820000  | 4.015378000  | -0.021112000 |
| H  | 3.477912000  | 3.897013000  | 0.804381000  |
| H  | 3.419741000  | 3.877034000  | -0.972444000 |
| C  | 0.797760000  | 4.287330000  | -1.193262000 |
| C  | 0.890510000  | 4.327448000  | 1.193334000  |
| H  | 1.218998000  | 4.034623000  | -2.167342000 |
| H  | -1.001985000 | 5.144042000  | -2.016432000 |
| H  | -0.834616000 | 5.227125000  | 2.123745000  |
| H  | 1.385635000  | 4.105249000  | 2.139938000  |
| Mo | -3.023392000 | 1.983816000  | 0.205951000  |
| Mo | -5.555432000 | -0.154311000 | -0.276449000 |
| O  | -3.129459000 | 3.171504000  | 1.462513000  |
| O  | -3.148938000 | 2.925192000  | -1.253978000 |
| O  | -3.270821000 | 0.267689000  | 1.589687000  |
| O  | -3.425268000 | 0.090643000  | -1.435914000 |
| O  | -5.066084000 | 1.574188000  | 0.075538000  |
| O  | -4.625376000 | -1.849305000 | 0.066656000  |
| O  | -6.344953000 | -0.219951000 | -1.817690000 |



|   |              |              |              |
|---|--------------|--------------|--------------|
| O | -6.853742000 | -0.418569000 | 0.839591000  |
| P | -2.571888000 | -1.143455000 | 1.642782000  |
| P | -2.589796000 | -1.245538000 | -1.452450000 |
| C | -3.210174000 | -2.028797000 | 0.118543000  |
| O | -2.971081000 | -1.940558000 | 2.881929000  |
| O | -2.925725000 | -2.147379000 | -2.638936000 |
| C | -2.983598000 | -3.547562000 | 0.185877000  |
| H | -3.500514000 | -3.972105000 | -0.687047000 |
| H | -3.499689000 | -3.900796000 | 1.091018000  |
| C | -1.559829000 | -4.038206000 | 0.203373000  |
| C | -0.856445000 | -4.215624000 | 1.402474000  |
| C | -0.895306000 | -4.385505000 | -0.980313000 |
| H | -1.309729000 | -3.931855000 | 2.353093000  |

Polyanion **3'** in B3LYP-D3(BJ)/Def2svp in water medium

Energy = -5395.6224775 hf

|    |              |              |              |
|----|--------------|--------------|--------------|
| Mo | 2.882471000  | 2.115724000  | -0.280148000 |
| O  | 2.904234000  | 3.351112000  | -1.489813000 |
| O  | 2.949515000  | 2.960717000  | 1.241183000  |
| O  | 1.176319000  | 1.496662000  | -0.218017000 |
| O  | 4.868186000  | 1.701523000  | -0.083504000 |
| O  | 3.137514000  | 0.340813000  | -1.569705000 |
| O  | 3.777457000  | -0.093650000 | 1.556540000  |
| Mo | 5.495312000  | -0.024899000 | 0.146004000  |
| O  | 6.430908000  | -0.212515000 | -1.307770000 |
| O  | 6.704218000  | -0.082303000 | 1.382010000  |
| O  | 4.670184000  | -1.807429000 | -0.196784000 |
| Mn | -0.000508000 | 0.001670000  | -0.000106000 |
| O  | -1.175861000 | -1.493391000 | 0.219235000  |
| O  | -1.319478000 | 0.927066000  | -1.627682000 |
| O  | 1.318438000  | -0.923213000 | 1.627784000  |

|    |              |              |              |
|----|--------------|--------------|--------------|
| O  | 0.942904000  | -1.018767000 | -1.346113000 |
| O  | -0.944777000 | 1.021807000  | 1.345521000  |
| P  | 2.503970000  | -1.102490000 | -1.579455000 |
| O  | 2.836456000  | -1.856834000 | -2.863704000 |
| C  | 3.265772000  | -2.019322000 | -0.131499000 |
| P  | 2.805417000  | -1.354177000 | 1.554715000  |
| O  | 3.214569000  | -2.386518000 | 2.613392000  |
| N  | -0.857299000 | -5.366775000 | -0.244254000 |
| C  | -0.285896000 | -4.952626000 | -1.383009000 |
| C  | -0.213549000 | -5.080112000 | 0.894710000  |
| C  | 3.064027000  | -3.538596000 | -0.265092000 |
| C  | 1.656882000  | -4.075783000 | -0.250704000 |
| H  | 3.550959000  | -3.836278000 | -1.204954000 |
| H  | 3.626682000  | -3.989523000 | 0.565218000  |
| C  | 1.023579000  | -4.438699000 | 0.945282000  |
| C  | 0.950368000  | -4.311359000 | -1.438410000 |
| H  | 1.508224000  | -4.248914000 | 1.903803000  |
| H  | -0.699768000 | -5.391095000 | 1.824778000  |
| H  | -0.830959000 | -5.157733000 | -2.310505000 |
| H  | 1.376309000  | -4.015190000 | -2.398199000 |
| Mo | -2.880874000 | -2.115738000 | 0.279599000  |
| Mo | -5.495025000 | 0.024176000  | -0.146517000 |
| O  | -2.943153000 | -2.960932000 | -1.242032000 |
| O  | -2.902260000 | -3.351301000 | 1.489170000  |
| O  | -3.776999000 | 0.093307000  | -1.554228000 |
| O  | -3.137679000 | -0.340188000 | 1.569379000  |
| O  | -4.864882000 | -1.702017000 | 0.080279000  |
| O  | -4.673017000 | 1.808929000  | 0.194654000  |
| O  | -6.424261000 | 0.205592000  | 1.312378000  |
| O  | -6.706840000 | 0.080836000  | -1.379370000 |

|   |              |             |              |
|---|--------------|-------------|--------------|
| P | -2.807021000 | 1.355652000 | -1.554669000 |
| P | -2.506069000 | 1.103739000 | 1.578880000  |
| C | -3.268485000 | 2.020681000 | 0.130940000  |
| O | -3.218449000 | 2.385987000 | -2.614309000 |
| O | -2.838737000 | 1.857819000 | 2.863266000  |
| C | -3.066067000 | 3.539872000 | 0.264819000  |
| H | -3.553363000 | 3.837723000 | 1.204447000  |
| H | -3.627924000 | 3.991387000 | -0.565726000 |
| C | -1.658186000 | 4.075211000 | 0.251361000  |
| C | -1.023843000 | 4.437337000 | -0.944337000 |
| C | -0.951877000 | 4.310016000 | 1.439341000  |
| H | -1.508336000 | 4.248796000 | -1.903163000 |
| C | 0.214252000  | 5.076880000 | -0.893355000 |
| C | 0.285382000  | 4.949407000 | 1.384394000  |
| H | -1.378650000 | 4.014758000 | 2.399019000  |

Polyanion  $I^{-}$  in B3LYP-D3(BJ)/Def2svp in water medium

Energy = -5188.7445478 hf

|    |              |              |              |
|----|--------------|--------------|--------------|
| Mo | 2.244010000  | 2.872603000  | 0.248013000  |
| O  | 2.046731000  | 4.105392000  | -0.979251000 |
| O  | 2.077206000  | 3.762087000  | 1.742982000  |
| O  | 0.740254000  | 1.917567000  | 0.164686000  |
| O  | 4.394772000  | 3.198551000  | 0.181683000  |
| O  | 3.179306000  | 1.480651000  | -1.355808000 |
| O  | 3.197543000  | 1.184736000  | 1.473711000  |
| Mo | 5.336731000  | 1.682137000  | -0.184078000 |
| O  | 6.239686000  | 2.014567000  | -1.627914000 |
| O  | 6.549718000  | 1.670264000  | 1.057078000  |
| O  | 5.001254000  | -0.260523000 | -0.285141000 |
| V  | -0.000153000 | 0.000767000  | 0.000256000  |
| O  | -0.740746000 | -1.915548000 | -0.163951000 |

|    |              |              |              |
|----|--------------|--------------|--------------|
| O  | -1.438865000 | 0.739862000  | -1.367232000 |
| O  | 1.438508000  | -0.738945000 | 1.367472000  |
| O  | 1.310448000  | -0.333693000 | -1.630666000 |
| O  | -1.310893000 | 0.335007000  | 1.631043000  |
| P  | 2.834430000  | -0.049087000 | -1.661416000 |
| O  | 3.519793000  | -0.512122000 | -2.947676000 |
| C  | 3.707679000  | -0.854896000 | -0.221035000 |
| P  | 2.949981000  | -0.379463000 | 1.426656000  |
| O  | 3.682161000  | -1.069787000 | 2.581727000  |
| N  | 7.554984000  | -4.294261000 | 0.526981000  |
| C  | 6.975686000  | -4.429157000 | -0.672253000 |
| C  | 6.906006000  | -3.534168000 | 1.423056000  |
| C  | 3.773587000  | -2.385769000 | -0.443846000 |
| C  | 5.086310000  | -3.038038000 | -0.083010000 |
| H  | 2.949566000  | -2.848077000 | 0.124809000  |
| H  | 3.585566000  | -2.598375000 | -1.505757000 |
| C  | 5.691083000  | -2.898874000 | 1.176063000  |
| C  | 5.764791000  | -3.827508000 | -1.020700000 |
| H  | 5.204381000  | -2.285728000 | 1.937048000  |
| H  | 7.383363000  | -3.420169000 | 2.402996000  |
| H  | 7.502388000  | -5.048850000 | -1.406593000 |
| H  | 5.354550000  | -3.973991000 | -2.022780000 |
| Mo | -2.243247000 | -2.872202000 | -0.248161000 |
| Mo | -5.336310000 | -1.682614000 | 0.184013000  |
| O  | -2.074648000 | -3.761781000 | -1.742852000 |
| O  | -2.045637000 | -4.104757000 | 0.979340000  |
| O  | -3.197160000 | -1.184766000 | -1.473539000 |
| O  | -3.178849000 | -1.480382000 | 1.356181000  |
| O  | -4.393759000 | -3.198691000 | -0.181769000 |
| O  | -5.001520000 | 0.260122000  | 0.285039000  |

|   |              |              |              |
|---|--------------|--------------|--------------|
| O | -6.239133000 | -2.015372000 | 1.627845000  |
| O | -6.549291000 | -1.671018000 | -1.057134000 |
| P | -2.950131000 | 0.379541000  | -1.426582000 |
| P | -2.834721000 | 0.049535000  | 1.661589000  |
| C | -3.708095000 | 0.854861000  | 0.220998000  |
| O | -3.682483000 | 1.069427000  | -2.581808000 |
| O | -3.520477000 | 0.512437000  | 2.947693000  |
| C | -3.774502000 | 2.385764000  | 0.443609000  |
| H | -2.950687000 | 2.848298000  | -0.125153000 |
| H | -3.586506000 | 2.598560000  | 1.505484000  |
| C | -5.087502000 | 3.037463000  | 0.082757000  |
| C | -5.691703000 | 2.898754000  | -1.176644000 |
| C | -5.766825000 | 3.825886000  | 1.020712000  |
| H | -5.204336000 | 2.286373000  | -1.937822000 |
| C | -6.906951000 | 3.533419000  | -1.423663000 |
| C | -6.977990000 | 4.426963000  | 0.672220000  |
| H | -5.357042000 | 3.971968000  | 2.023038000  |
| N | -7.556757000 | 4.292484000  | -0.527318000 |
| H | -7.383858000 | 3.419792000  | -2.403865000 |
| H | -7.505376000 | 5.045820000  | 1.406774000  |

Polyanion 2<sup>-</sup> in B3LYP-D3(BJ)/Def2svp in water medium

Energy = -5289.2194269 hf

|    |             |              |              |
|----|-------------|--------------|--------------|
| Mo | 2.614878000 | -2.812381000 | -0.795092000 |
| O  | 2.931652000 | -4.271346000 | 0.120098000  |
| O  | 3.194373000 | -3.288510000 | -2.376112000 |
| O  | 0.883590000 | -2.687647000 | -0.947730000 |
| O  | 5.762144000 | -2.166338000 | -0.229501000 |
| O  | 2.989127000 | -1.812827000 | 1.076700000  |
| O  | 3.252188000 | -0.826466000 | -1.451358000 |
| Mo | 6.238506000 | -0.571264000 | 0.289452000  |

|    |              |              |              |
|----|--------------|--------------|--------------|
| O  | 7.250195000  | -0.794122000 | 1.691483000  |
| O  | 7.262385000  | 0.090919000  | -0.965472000 |
| O  | 4.908976000  | 0.781505000  | 0.753128000  |
| Cr | -0.015442000 | 0.085629000  | 0.010431000  |
| O  | -0.898045000 | 2.649290000  | 0.802917000  |
| O  | -1.454513000 | -0.826263000 | 1.141351000  |
| O  | 1.437730000  | 0.988889000  | -1.111071000 |
| O  | 1.158599000  | -0.106796000 | 1.675041000  |
| O  | -1.165244000 | 0.163122000  | -1.678653000 |
| P  | 2.691417000  | -0.411169000 | 1.733509000  |
| O  | 3.293569000  | -0.314087000 | 3.134148000  |
| C  | 3.502539000  | 0.888058000  | 0.669520000  |
| P  | 2.972640000  | 0.685549000  | -1.100992000 |
| O  | 3.793983000  | 1.606063000  | -2.001770000 |
| N  | 3.951335000  | 5.653958000  | -1.260001000 |
| C  | 2.698358000  | 5.212470000  | -1.081797000 |
| C  | 4.919876000  | 5.006449000  | -0.595792000 |
| C  | 3.065106000  | 2.252179000  | 1.263890000  |
| C  | 3.381276000  | 3.453656000  | 0.422057000  |
| H  | 1.984852000  | 2.218041000  | 1.449658000  |
| H  | 3.568455000  | 2.327424000  | 2.240857000  |
| C  | 4.691023000  | 3.922426000  | 0.249645000  |
| C  | 2.365916000  | 4.133115000  | -0.264893000 |
| H  | 5.525600000  | 3.434471000  | 0.755863000  |
| H  | 5.942615000  | 5.371101000  | -0.743187000 |
| H  | 1.907795000  | 5.745925000  | -1.621321000 |
| H  | 1.327059000  | 3.809531000  | -0.171891000 |
| Mo | -2.634051000 | 2.830553000  | 0.713185000  |
| Mo | -6.262121000 | 0.472525000  | -0.262063000 |
| O  | -3.140905000 | 3.352982000  | 2.303398000  |

|   |              |              |              |
|---|--------------|--------------|--------------|
| O | -2.962646000 | 4.277917000  | -0.216624000 |
| O | -3.364391000 | 0.910986000  | 1.377451000  |
| O | -3.062459000 | 1.815943000  | -1.156374000 |
| O | -5.935132000 | 2.183219000  | -0.103980000 |
| O | -4.900242000 | -0.833692000 | -0.778349000 |
| O | -7.511654000 | 0.287220000  | -1.471399000 |
| O | -6.945165000 | -0.076030000 | 1.250931000  |
| P | -3.000211000 | -0.603370000 | 1.095810000  |
| P | -2.708252000 | 0.408370000  | -1.768046000 |
| C | -3.491710000 | -0.887345000 | -0.672613000 |
| O | -3.790495000 | -1.520924000 | 2.024376000  |
| O | -3.284894000 | 0.242764000  | -3.172442000 |
| C | -3.000184000 | -2.252979000 | -1.215960000 |
| H | -1.918584000 | -2.189069000 | -1.385177000 |
| H | -3.483968000 | -2.375118000 | -2.198046000 |
| C | -3.292255000 | -3.436188000 | -0.340176000 |
| C | -4.587354000 | -3.947964000 | -0.178691000 |
| C | -2.268067000 | -4.052472000 | 0.391810000  |
| H | -5.428558000 | -3.511342000 | -0.719500000 |
| C | -4.794158000 | -5.010120000 | 0.699876000  |
| C | -2.577936000 | -5.114466000 | 1.239532000  |
| H | -1.240355000 | -3.694101000 | 0.306362000  |
| N | -3.817307000 | -5.596694000 | 1.407035000  |
| H | -5.805553000 | -5.408327000 | 0.838430000  |
| H | -1.780148000 | -5.598432000 | 1.813942000  |

Polyanion  $3^-$  in B3LYP-D3(BJ)/Def2svp in water medium

Energy = -5395.7520669 hf

|    |             |             |              |
|----|-------------|-------------|--------------|
| Mo | 3.157265000 | 2.519445000 | -0.023473000 |
| O  | 3.316272000 | 3.723411000 | -1.274559000 |
| O  | 3.080272000 | 3.360920000 | 1.511935000  |

|    |              |              |              |
|----|--------------|--------------|--------------|
| O  | 1.598553000  | 1.725670000  | -0.229147000 |
| O  | 4.873872000  | 1.611602000  | -0.074678000 |
| O  | 3.198599000  | -0.241778000 | -1.876362000 |
| O  | 3.582350000  | -0.135253000 | 1.388866000  |
| Mo | 5.308504000  | -0.246306000 | 0.060927000  |
| O  | 6.188281000  | -0.387567000 | -1.430825000 |
| O  | 6.539123000  | -0.353511000 | 1.265261000  |
| O  | 4.539702000  | -2.042634000 | -0.088246000 |
| Mn | 0.001115000  | 0.000624000  | -0.000747000 |
| O  | -1.598870000 | -1.724998000 | 0.230025000  |
| O  | -1.144592000 | 1.004963000  | -1.549745000 |
| O  | 1.144424000  | -1.005777000 | 1.549679000  |
| O  | 0.895104000  | -1.363485000 | -1.436196000 |
| O  | -0.895705000 | 1.362131000  | 1.436380000  |
| P  | 2.431116000  | -1.577315000 | -1.658778000 |
| O  | 2.726006000  | -2.620899000 | -2.758057000 |
| C  | 3.135436000  | -2.281194000 | -0.052588000 |
| P  | 2.637756000  | -1.414643000 | 1.526722000  |
| O  | 3.052777000  | -2.290054000 | 2.719131000  |
| N  | -0.925858000 | -5.665545000 | 0.171165000  |
| C  | -0.276580000 | -5.487247000 | -0.986140000 |
| C  | -0.364735000 | -5.137399000 | 1.267907000  |
| C  | 2.976769000  | -3.806131000 | 0.032970000  |
| C  | 1.577937000  | -4.358931000 | 0.068885000  |
| H  | 3.503243000  | -4.219735000 | -0.838555000 |
| H  | 3.509844000  | -4.127621000 | 0.940292000  |
| C  | 0.864372000  | -4.479926000 | 1.269765000  |
| C  | 0.955929000  | -4.845238000 | -1.088883000 |
| H  | 1.283979000  | -4.090927000 | 2.198959000  |
| H  | -0.918250000 | -5.252601000 | 2.205260000  |



|    |              |              |              |
|----|--------------|--------------|--------------|
| H  | -0.753164000 | -5.891308000 | -1.885714000 |
| H  | 1.443177000  | -4.730141000 | -2.057347000 |
| Mo | -3.157268000 | -2.519075000 | 0.024351000  |
| Mo | -5.308821000 | 0.246449000  | -0.061219000 |
| O  | -3.080075000 | -3.360547000 | -1.511158000 |
| O  | -3.316007000 | -3.722993000 | 1.275587000  |
| O  | -3.582563000 | 0.134945000  | -1.388886000 |
| O  | -3.199908000 | 0.242012000  | 1.876905000  |
| O  | -4.874169000 | -1.611439000 | 0.075572000  |
| O  | -4.539835000 | 2.042698000  | 0.087621000  |
| O  | -6.188743000 | 0.388333000  | 1.430342000  |
| O  | -6.539418000 | 0.353099000  | -1.265591000 |
| P  | -2.637827000 | 1.414152000  | -1.526813000 |
| P  | -2.431541000 | 1.576999000  | 1.658790000  |
| C  | -3.135484000 | 2.280941000  | 0.052399000  |
| O  | -3.052664000 | 2.289544000  | -2.719305000 |
| O  | -2.725798000 | 2.621020000  | 2.757820000  |
| C  | -2.976473000 | 3.805816000  | -0.033279000 |
| H  | -3.502866000 | 4.219553000  | 0.838234000  |
| H  | -3.509547000 | 4.127302000  | -0.940601000 |
| C  | -1.577567000 | 4.358483000  | -0.069264000 |
| C  | -0.864102000 | 4.479598000  | -1.270218000 |
| C  | -0.955414000 | 4.844698000  | 1.088463000  |
| H  | -1.283856000 | 4.090662000  | -2.199381000 |
| C  | 0.364977000  | 5.137134000  | -1.268477000 |
| C  | 0.277075000  | 5.486727000  | 0.985618000  |
| H  | -1.442648000 | 4.729725000  | 2.056930000  |
| N  | 0.926175000  | 5.665181000  | -0.171739000 |
| H  | 0.918348000  | 5.252515000  | -2.205903000 |
| H  | 0.753717000  | 5.890779000  | 1.885164000  |

Polyanion 1<sup>+</sup> in B3LYP-D3(BJ)/Def2svp in water medium

Energy = -5188.5611881 hf

|    |              |              |              |
|----|--------------|--------------|--------------|
| Mo | -3.011620000 | -1.987482000 | -0.200623000 |
| O  | -2.871328000 | -2.931301000 | -1.630372000 |
| O  | -3.005251000 | -3.160811000 | 1.063005000  |
| O  | -1.265141000 | -1.291654000 | 0.005637000  |
| O  | -4.967916000 | -1.643198000 | 0.018718000  |
| O  | -3.227305000 | -0.224807000 | -1.572757000 |
| O  | -3.362860000 | -0.137589000 | 1.471277000  |
| Mo | -5.494136000 | 0.126508000  | 0.319972000  |
| O  | -6.749571000 | 0.313124000  | -0.850507000 |
| O  | -6.318587000 | 0.226713000  | 1.831382000  |
| O  | -4.588181000 | 1.829886000  | 0.016943000  |
| V  | 0.001930000  | 0.006388000  | 0.015279000  |
| O  | 1.266450000  | 1.293405000  | 0.007729000  |
| O  | 0.975084000  | -1.013075000 | -1.392646000 |
| O  | -1.011301000 | 0.954452000  | 1.435119000  |
| O  | -0.977048000 | 1.018908000  | -1.391470000 |
| O  | 1.009175000  | -0.951602000 | 1.435299000  |
| P  | -2.536802000 | 1.186881000  | -1.571214000 |
| O  | -2.898534000 | 2.028259000  | -2.788321000 |
| C  | -3.174578000 | 2.030885000  | -0.025715000 |
| P  | -2.560226000 | 1.218801000  | 1.534500000  |
| O  | -2.915674000 | 2.083282000  | 2.738161000  |
| N  | 0.990671000  | 5.297827000  | -0.211920000 |
| C  | 0.309505000  | 5.011822000  | -1.328587000 |
| C  | 0.442772000  | 4.912553000  | 0.948061000  |
| C  | -2.964606000 | 3.551643000  | -0.057033000 |
| C  | -1.548532000 | 4.063797000  | -0.115669000 |
| H  | -3.517324000 | 3.923916000  | -0.931611000 |

|    |              |              |              |
|----|--------------|--------------|--------------|
| H  | -3.451828000 | 3.948620000  | 0.845762000  |
| C  | -0.804155000 | 4.297125000  | 1.048506000  |
| C  | -0.944108000 | 4.400999000  | -1.333973000 |
| H  | -1.208979000 | 4.029127000  | 2.025623000  |
| H  | 1.018183000  | 5.119116000  | 1.855771000  |
| H  | 0.775798000  | 5.299421000  | -2.276835000 |
| H  | -1.458318000 | 4.206825000  | -2.276270000 |
| Mo | 3.021752000  | 1.989395000  | -0.199537000 |
| Mo | 5.491879000  | -0.131421000 | 0.320440000  |
| O  | 2.881448000  | 2.932977000  | -1.628565000 |
| O  | 3.004895000  | 3.161792000  | 1.063883000  |
| O  | 3.227474000  | 0.227185000  | -1.573012000 |
| O  | 3.363123000  | 0.136951000  | 1.470620000  |
| O  | 4.973718000  | 1.645318000  | 0.026814000  |
| O  | 4.583962000  | -1.832467000 | 0.015981000  |
| O  | 6.318410000  | -0.238670000 | 1.829201000  |
| O  | 6.745256000  | -0.318225000 | -0.852000000 |
| P  | 2.534224000  | -1.183730000 | -1.572466000 |
| P  | 2.557378000  | -1.218293000 | 1.533807000  |
| C  | 3.169930000  | -2.030299000 | -0.027271000 |
| O  | 2.895256000  | -2.024805000 | -2.789932000 |
| O  | 2.913013000  | -2.083522000 | 2.736806000  |
| C  | 2.957975000  | -3.550556000 | -0.059604000 |
| H  | 3.445926000  | -3.948563000 | 0.842343000  |
| H  | 3.509524000  | -3.922727000 | -0.934967000 |
| C  | 1.541865000  | -4.062448000 | -0.116948000 |
| C  | 0.936569000  | -4.399504000 | -1.334791000 |
| C  | 0.799498000  | -4.298202000 | 1.048032000  |
| H  | 1.449167000  | -4.203204000 | -2.277549000 |
| C  | -0.314913000 | -5.014664000 | -1.328169000 |

|   |              |              |              |
|---|--------------|--------------|--------------|
| C | -0.445541000 | -4.917662000 | 0.948757000  |
| H | 1.205036000  | -4.029936000 | 2.024802000  |
| N | -0.993388000 | -5.304348000 | -0.210803000 |
| H | -0.781482000 | -5.303128000 | -2.276003000 |
| H | -1.019084000 | -5.126818000 | 1.857068000  |

## References

- [S1] (a) Becke, A. D. A New Mixing of Hartree–Fock and Local Density-Functional Theories. *J. Chem. Phys.* **1993**, 98 (2), 1372-1377. <https://doi.org/10.1063/1.464304> (b) Stephens, P. J.; Devlin, F. J.; Chabalowski, C. F.; Frisch, M. J. Ab Initio Calculation of Vibrational Absorption and Circular Dichroism Spectra Using Density Functional Force Fields. *J. Phys. Chem.* **1994**, 98 (45), 11623-11627. <https://doi.org/10.1021/j100096a001> (c) Lee, C.; Yang, W.; Parr, R. G. Development of the Colle-Salvetti Correlation-Energy Formula into a Functional of the Electron Density. *Phys. Rev. B* **1988**, 37 (2), 785–789. <https://doi.org/10.1103/PhysRevB.37.785> (d) Becke, A. D. Density-functional thermochemistry. III. The role of exact exchange. *J. Chem. Phys.* **1993**, 98 (7), 5648-5652. <https://doi.org/10.1063/1.464913> (e) Grimme, S.; Antony, J.; Ehrlich, S.; Krieg, H. A Consistent and Accurate Ab Initio Parametrization of Density Functional Dispersion Correction (DFT-D) for the 94 Elements H-Pu. *J. Chem. Phys.* **2010**, 132 (15), 154104. <https://doi.org/10.1063/1.3382344> (f) Grimme, S.; Ehrlich, S.; Goerigk, L. Effect of the damping function in dispersion corrected density functional theory. *J. Comp. Chem.* **2011**, 32 (7), 1456-1465. <https://doi.org/10.1002/jcc.21759>
- [S2] (a) Glendening, E. D.; Landis, C. R.; Weinhold, F. *J. Comput. Chem.* **2013**, 34, 1429.
- [S3] Kohn, W.; Sham, L. J. Self-Consistent Equations Including Exchange and Correlation Effects. *Phys. Rev.* 1965, 140, A1133-A1138.
